24 **Summary (250 words)**

25 The nucleotide second messenger c-di-AMP negatively regulates potassium and osmolyte  
26 uptake in *Staphylococcus aureus* and many other bacteria. c-di-AMP is also important for  
27 growth and an *S. aureus* strain deleted for the c-di-AMP cyclase gene *dacA* is unable to  
28 survive in rich medium unless it acquires compensatory mutations. Previously, we have  
29 shown that an *S. aureus dacA* mutant can grow after the acquisition of inactivating mutants  
30 in *opuD*, encoding the main glycine-betaine osmolyte transporter, or mutations in *alsT*,  
31 encoding a predicted amino acid transporter. Using the size of bacterial cells as a proxy for  
32 their osmotic balance, we show that inactivation of OpuD helps bacteria to re-establish their  
33 osmotic balance, while inactivation of AlsT does not and bacteria remain enlarged, a  
34 characteristic of *S. aureus* cells unable to produce c-di-AMP. We show that AlsT is the main  
35 glutamine transporter in *S. aureus*, thus revealing that *S. aureus* can survive without c-di-  
36 AMP when glutamine uptake is prevented. Using a bioinformatics approach combined with  
37 uptake assays, we identified GltS as the main glutamate transporter in *S. aureus*. Using WT  
38 and mutant strain, we show that glutamine is preferred over glutamate for bacterial growth  
39 and that its uptake represses c-di-AMP production. Glutamine and glutamate are important  
40 players in osmotic regulation, but their cellular levels also serve as a key indicator of  
41 nitrogen availability in bacterial cells. Therefore, we not only provide a further connection  
42 between the c-di-AMP signalling network and osmotic regulation in *S. aureus* but also to  
43 central nitrogen metabolism.

44

45

46

## 47 **Introduction**

48           In the human host, *Staphylococcus aureus* can infect various niches, including, but  
49 not limited to, blood, kidneys, bones, heart, soft tissue and lungs (Kluytmans *et al.*, 1997,  
50 Fridkin *et al.*, 2005). *S. aureus* can colonize these different tissues thanks to its refined  
51 regulatory mechanisms that allow it to rapidly respond to external stimuli. Amongst others,  
52 this allows the organism to adapt its metabolism and utilize different carbon and nitrogen  
53 sources available in each specific niche (Fridkin *et al.*, 2005, Spahich *et al.*, 2016, Vitko *et*  
54 *al.*, 2015, Crooke *et al.*, 2013, Fuller *et al.*, 2011, Richardson *et al.*, 2008, Halsey *et al.*,  
55 2017, Lehman *et al.*, 2019).

56           Glucose is the preferred carbon source for *S. aureus*, but it can be limiting during  
57 infection due to the host immune response (Kelly & O'Neill, 2015, Spahich *et al.*, 2016,  
58 Halsey *et al.*, 2017, Lehman *et al.*, 2019). In glucose-limiting conditions, *S. aureus* instead  
59 catabolizes secondary carbon sources; amino acids, particularly glutamate and proline,  
60 serve as major carbon sources during growth in the absence of glucose (Halsey *et al.*,  
61 2017). However, not much is known about amino acid uptake and catabolism in *S. aureus*  
62 and how the availability of certain nutrients can affect virulence factor expression and  
63 invasion of the host. While a large number of amino acid transporters and oligopeptide  
64 permeases can be identified bioinformatically, their actual substrate specificities and  
65 functions in *S. aureus* have not yet been studied in detail. Also, predicting the substrates for  
66 transporters bioinformatically remains difficult and hence such questions need to be  
67 addressed experimentally.

68           Secondary messenger molecules are crucial in allowing bacteria to rapidly adapt to  
69 different environmental and host cell niches (Römling, 2008, Hengge, 2009). There is now  
70 considerable evidence that one such messenger, cyclic di-adenosine monophosphate (c-di-  
71 AMP) plays a significant role in osmoregulation in bacteria (Pham *et al.*, 2018, Pham &  
72 Turner, 2019, Quintana *et al.*, 2019, Zarrella *et al.*, 2018, Teh *et al.*, 2019, Fahmi *et al.*,  
73 2019, Devaux *et al.*, 2018, Bai *et al.*, 2014, Zeden *et al.*, 2018, Corrigan *et al.*, 2011, Rocha  
74 *et al.*, 2019, Gundlach *et al.*, 2017b, Gundlach *et al.*, 2017a, Witte *et al.*, 2013, Whiteley *et*

75 *al.*, 2015, Whiteley *et al.*, 2017). c-di-AMP binds to and negatively regulates a number of  
76 different potassium and osmolyte importers (Rocha *et al.*, 2019, Quintana *et al.*, 2019, Kim  
77 *et al.*, 2015, Corrigan *et al.*, 2013, Moscoso *et al.*, 2015, Chin *et al.*, 2015, Huynh *et al.*,  
78 2016, Schuster *et al.*, 2016, Pham & Turner, 2019, Pham *et al.*, 2018, Devaux *et al.*, 2018,  
79 Zarrella *et al.*, 2018, Gundlach *et al.*, 2017b, Gundlach *et al.*, 2017a, Gundlach *et al.*,  
80 2017c). c-di-AMP is essential for bacterial growth under standard growth conditions but it is  
81 also toxic at high levels in many Firmicutes, hence its cellular levels must be tightly regulated  
82 (Gundlach *et al.*, 2015b, Mehne *et al.*, 2013, Corrigan *et al.*, 2011, Corrigan *et al.*, 2015,  
83 Woodward *et al.*, 2010, Witte *et al.*, 2013). In *S. aureus* and *Listeria monocytogenes*,  
84 deletion of the diadenylate cyclase gene *dacA*, the enzyme responsible for the synthesis of  
85 c-di-AMP, was only possible in chemically defined medium (Whiteley *et al.*, 2015, Zeden *et*  
86 *al.*, 2018, Devaux *et al.*, 2018), whereas in *Bacillus subtilis* all three c-di-AMP cyclases could  
87 only be inactivated in minimal medium also containing low amounts of potassium (Gundlach  
88 *et al.*, 2017b).

89 Previously, we found that inactivation of the main glycine betaine transporter OpuD as well  
90 as the predicted amino acid transporter AlsT (SAUSA300\_1252) allows an *S. aureus dacA*  
91 mutant to grow in rich medium in the absence of c-di-AMP (Zeden *et al.*, 2018). In several  
92 other Firmicutes, including *B. subtilis*, *Lactococcus lactis*, *Streptococcus pneumoniae*,  
93 *Streptococcus pyogenes* and *L. monocytogenes*, inactivating mutations have also been  
94 identified in osmolyte and potassium transport systems that allow these bacteria to grow in  
95 the absence of c-di-AMP (Pham *et al.*, 2018, Pham & Turner, 2019, Quintana *et al.*, 2019,  
96 Zarrella *et al.*, 2018, Teh *et al.*, 2019, Fahmi *et al.*, 2019, Devaux *et al.*, 2018, Bai *et al.*,  
97 2014, Zeden *et al.*, 2018, Corrigan *et al.*, 2011, Rocha *et al.*, 2019, Gundlach *et al.*, 2017b,  
98 Gundlach *et al.*, 2017a, Witte *et al.*, 2013, Whiteley *et al.*, 2015, Whiteley *et al.*, 2017). This  
99 is consistent with the idea that in the absence of c-di-AMP, potassium and osmolyte  
100 transporters are more active, resulting in the accumulation of toxic levels of potassium and  
101 osmolytes in the cell. Consistent with a key function of c-di-AMP in regulating the osmotic  
102 balance in the cell, we found that *S. aureus* cells show significant differences in cell size

103 depending on their intracellular c-di-AMP levels (Zeden *et al.*, 2018, Corrigan *et al.*, 2011).  
104 Bacteria of the high c-di-AMP level *S. aureus* mutant strain LAC\**gdpP* show a decrease in  
105 cell size, while cells of the low level c-di-AMP strain LAC\**dacA*<sub>G206S</sub> show an increase in cell  
106 size (Zeden *et al.*, 2018, Corrigan *et al.*, 2011). As c-di-AMP negatively regulates potassium  
107 and osmolyte uptake (Corrigan *et al.*, 2013, Moscoso *et al.*, 2015, Schuster *et al.*, 2016), the  
108 increase in cell size is consistent with the hypothesis that an increase in potassium and  
109 osmolyte uptake and retention of water at reduced c-di-AMP levels leads to the observed  
110 increase in cell size. As part of this study, we further investigated the mechanisms by which  
111 inactivation of the main glycine betaine transporter OpuD and the predicted amino acid  
112 transporter AlsT allow *S. aureus* to survive in the absence of c-di-AMP.

113         The counterion of potassium in the cell is glutamate, which at the same time also  
114 serves as main nitrogen donor for cellular metabolites and macromolecules. A correlation  
115 between cellular levels of c-di-AMP, glutamate and glutamine has been reported for several  
116 Firmicutes, including *B. subtilis* and *L. monocytogenes* (Whiteley *et al.*, 2017, Gundlach *et*  
117 *al.*, 2015b, Gundlach *et al.*, 2017a, Sureka *et al.*, 2014). A two-fold increase in cellular c-di-  
118 AMP levels was observed in *B. subtilis* when bacteria were grown in Spizizen minimal  
119 medium with glutamate (Glu) as compared to growth in the same medium with glutamine  
120 (Gln) as nitrogen source (Gundlach *et al.*, 2015b). In *L. monocytogenes*, c-di-AMP is a  
121 negative regulator of the key TCA cycle enzyme pyruvate carboxylase (Sureka *et al.*, 2014).  
122 The depletion of c-di-AMP in the cell resulted in an increased flux of glucose into the  
123 production of glutamine and glutamate, likely due to increased pyruvate carboxylase activity  
124 and increased flux into the TCA cycle at reduced c-di-AMP levels (Sureka *et al.*, 2014).  
125 Interestingly, an *L. monocytogenes dacA* mutant that also lacks *citZ*, which codes for the key  
126 TCA cycle enzyme citrate synthase, is viable in rich medium (Sureka *et al.*, 2014, Whiteley  
127 *et al.*, 2017). In a *citZ* mutant the TCA cycle is blocked and it was shown that depletion of c-  
128 di-AMP in this mutant no longer results in the accumulation of glutamate and glutamine in  
129 the cell (Sureka *et al.*, 2014). Therefore, the amino acids glutamine and glutamate not only  
130 play an important function in the osmotic regulation in bacterial cells, but also have a

131 particularly critical role in TCA cycle function and their cellular ratio has an important role in  
132 signalling nitrogen-limiting (high glutamate levels and low glutamine levels) or nitrogen  
133 excess (high glutamine and low glutamate levels) conditions (Halsey *et al.*, 2017, Gundlach  
134 *et al.*, 2017a).

135 As part of this study, we further investigated why inactivation of the main glycine-  
136 betaine transporter OpuD and the predicted amino acid transporter AlsT allows *S. aureus* to  
137 grow in the absence of c-di-AMP. Our results indicate that inactivation of OpuD helps  
138 bacteria to re-establish their osmotic balance, while inactivation of AlsT, which we show here  
139 is the main glutamine transporter in *S. aureus*, functions differently to bypass the essentiality  
140 of c-di-AMP and possible mechanisms are discussed. We also identified the *S. aureus* GltS  
141 protein as the main glutamate transporter in *S. aureus* and show that glutamine but not  
142 glutamate uptake represses the production of c-di-AMP. With this study, we not only provide  
143 a further link between the c-di-AMP signalling network and osmotic regulation in bacterial  
144 cells but also to the central nitrogen metabolism in *S. aureus*.

145

## 146 **Results**

### 147 **Inactivation of OpuD but not AlsT reduces the cell size of an *S. aureus* *dacA* mutant**

148 In previous work, we reported a correlation between the cell size and c-di-AMP levels in *S.*  
149 *aureus*: bacteria with high c-di-AMP level are smaller, whereas bacteria with low c-di-AMP  
150 levels (strain LAC\**dacA*<sub>G206S</sub>) are larger as compared to wild-type bacteria (Zeden *et al.*,  
151 2018, Corrigan *et al.*, 2011). We also reported that inactivating mutations in *opuD*  
152 (*SAUSA300\_1245*) coding for the main glycine betaine osmolyte transporter and *alsT*  
153 (*SAUSA300\_1252*) coding for a predicted amino acid sodium symporter, rescue the growth  
154 defect observed for the c-di-AMP negative *S. aureus* strain LAC\**dacA*::*kan* in rich medium  
155 (Zeden *et al.*, 2018). To investigate the mechanism by which the growth defect of the *dacA*  
156 mutant strain is rescued in the LAC\**dacA/opuD* and LAC\**dacA/alsT* suppressor strains and  
157 to assess if restoring the osmotic imbalance could be a contributing factor, the cell size of  
158 WT and different *S. aureus* mutants was determined. Initially, the cell size of

159 LAC\**dacA/opuD* and LAC\**dacA/alsT* suppressor strain bacteria was compared to that of WT  
160 LAC\* and the low-level c-di-AMP LAC\**dacA<sub>G206S</sub>* strain after growth in TSB medium. As  
161 expected, the low-level c-di-AMP bacteria showed an increase in cell size as compared to  
162 WT bacteria (Fig. 1A and B). While a similar increase in cell size was still observed for  
163 bacteria of strain LAC\**dacA/alsT*, the cell size of LAC\**dacA/opuD* bacteria, while still  
164 increased as compared WT, was significantly smaller as compared to the low-level  
165 LAC\**dacA<sub>G206S</sub>* strain (Fig. 1A and B). As TSB medium is not suitable for the growth of the c-  
166 di-AMP null strain LAC\**dacA::kan*, bacterial cell sizes were also determined for the WT and  
167 mutant *S. aureus* strains following growth in TSB supplemented with 0.4 M NaCl, which is  
168 permissive for the growth of the *dacA* mutant (Fig. 1C-F). Bacteria from all strains had a  
169 reduced cell size when grown in TSB supplemented with 0.4 M NaCl compared to bacteria  
170 grown in TSB (Fig. 1). Similar to what was observed for the low level c-di-AMP *dacA<sub>G206S</sub>*  
171 mutant strain, the size of bacteria from the c-di-AMP null strain LAC\**dacA::kan* was  
172 significantly increased compared to WT bacteria. As observed before, the cell size was not  
173 rescued for bacteria of the LAC\**dacA/alsT* suppressor strain (Fig. 1C-F). On the other hand,  
174 the size of LAC\**dacA/opuD* bacteria was similar to that of WT bacteria (Fig. 1C-F). Taken  
175 together, these data indicate that inactivation of OpuD, and hence reduced glycine betaine  
176 transport, likely helps bacteria to survive in the absence of c-di-AMP by re-establishing the  
177 osmotic balance in the mutant while a different mechanism is at play for the *alsT* mutant.

178

### 179 **Bacteria lacking *alsT* have an altered amino acid uptake profile**

180 AlsT (SAUSA300\_1252) is a predicted amino acid transporter protein and annotated as an  
181 alanine/sodium symporter. However, no difference in the uptake of radiolabelled alanine was  
182 detected between a WT and the LAC\**dacA/alsT* mutant strain in our previous study (Zeden  
183 *et al.*, 2018), indicating that AlsT is not an alanine transporter. To identify potential  
184 substrates for the *S. aureus* AlsT transporter, we followed the depletion of different amino  
185 acids from the culture supernatant during the growth of the WT and *alsT* mutant strains in  
186 TSB medium. To this end, strain LAC\**alsT::tn* containing a transposon insertion in *alsT* was



187 constructed by phage transducing the *alsT::tn* region from the Nebraska Transposon Mutant  
188 Library (NMTL) strain NE142 (Fey *et al.*, 2013) into the *S. aureus* LAC\* strain background.  
189 WT LAC\* and the *alsT* mutant strain LAC\**alsT::tn* showed similar growth rates when grown  
190 in TSB medium (Fig. 2A). Next, their ability to take up different amino acids was assessed by  
191 determining the levels of the individual amino acids in the culture supernatant at the start of  
192 the experiment (T = 0 h) as compared to 6, 10 and 12 h following their growth in TSB  
193 medium. While no significant differences were observed for most amino acids (Fig. S1), a  
194 slight increase in the utilization of aspartate and a slight decrease in the uptake of serine  
195 was observed (Fig. 2B and 2C), suggesting that AlsT could potentially be a serine  
196 transporter. To test this, uptake assays were performed with radiolabelled serine using the  
197 WT LAC\* strain, the *alsT* mutant strain LAC\**alsT::tn* pTET as well as the complementation  
198 strain LAC\**alsT::tn* pTET-*alsT*. However, no significant differences in the uptake rate of  
199 serine were observed between the strains (Fig. 3A), indicating that AlsT is not the main  
200 serine transporter in *S. aureus*. While slight differences in the amino acid uptake profile were  
201 observed between the WT and *alsT* mutant strain, this analysis did not allow us to identify  
202 the main substrate for AlsT. However, it is of note that using this method one cannot  
203 distinguish between glutamine and glutamate or asparagine and aspartate utilization.  
204 Additionally, tryptophan was not measured due to the limitations of the method used.

205

### 206 **AlsT is the main glutamine transporter in *S. aureus***

207 Next, a more detailed bioinformatics analysis was performed to identify potential AlsT  
208 substrates. A BlastP search against the *B. subtilis* 168 genome led to the identification of  
209 four close homologs of AlsT (SAUSA300\_1252), namely AlsT (e-value: e-166), GlnT (e-  
210 value: e-149), YrbD (e-value: e-117) and YfiA (e-value: 2e-72). Of note, an AlsT homologue  
211 SAUSA300\_0914 is also present in the *S. aureus* FPR3757 genome (Fig. S2). While *S.*  
212 *aureus* AlsT (SAUSA300\_1252) shows the highest similarity to the *B. subtilis* AlsT and GlnT  
213 proteins, SAUSA300\_0914 has the highest similarity with the *B. subtilis* YrbD protein. AlsT is  
214 annotated in *B. subtilis* as a potential glutamine sodium symporter, but to the best of our



215 knowledge, this has not yet been experimentally verified. Expression of *alsT* is controlled in  
216 *B. subtilis* by GlnR and TnrA, the two main transcriptional regulators adjusting gene  
217 expression in response to nitrogen availability (Randazzo *et al.*, 2017, Yoshida *et al.*, 2003,  
218 Mirouze *et al.*, 2015). GlnT is a confirmed glutamine transporter in *B. subtilis* (Satomura *et*  
219 *al.*, 2005), whose production is induced in the presence of glutamine as nitrogen source by  
220 the two-component system GlnKL. To test if *S. aureus* AlsT is a potential glutamine or  
221 glutamate transporter, uptake assays were performed with radiolabelled glutamine and  
222 glutamate using the WT *S. aureus* strain LAC\*, the *alsT* mutant LAC\**alsT::tn* pTET and the  
223 complementation strain LAC\**alsT::tn* pTET-*alsT*. Uptake of glutamine, but not of glutamate,  
224 was severely reduced in the *alsT* mutant when compared to the WT (Fig. 3B). This defect  
225 was restored upon expression of *alsT* in the complementation strain (Fig. 3C). To confirm  
226 that *alsT* also functions as main glutamine transporter in the LAC\**dacA/alsT* suppressor  
227 strain, uptake assays were also performed with strain LAC\**dacA/alsT* and compared to that  
228 of the WT LAC\* and LAC\**dacA::kan* control strains (Fig. 3D-F). Similar to what was  
229 observed for the *alsT* mutant, glutamine uptake was severely attenuated in strain  
230 LAC\**dacA/alsT* when compared to the control strains (Fig. 3D-F). These data highlight that  
231 under the growth conditions tested, AlsT functions as the main glutamine transporter in *S.*  
232 *aureus*. A slight reduction in glutamine uptake was seen in the absence of c-di-AMP,  
233 suggesting that c-di-AMP levels can impact glutamine uptake in *S. aureus*. But perhaps  
234 most importantly, our data suggest that bacteria lacking c-di-AMP can survive in rich  
235 medium when glutamine uptake is blocked.

236

### 237 **Investigating the contribution of SAUSA300\_0914 and GlnPQ to glutamine and** 238 **glutamate transport in *S. aureus***

239 *S. aureus* SAUSA300\_0914 codes for a predicted amino acid symporter, which shows 41%  
240 identity with the *S. aureus* AlsT protein. After assigning AlsT a function as glutamine  
241 transporter, we wanted to test if SAUSA300\_0914 might also play a role in glutamine or  
242 glutamate transport. To this end, strain LAC\*0914::tn was constructed by transducing the

243 genomic region from the NMTL strain NE1463 (Fey *et al.*, 2013) containing a transposon  
244 insertion in SAUSA300\_0914 into the *S. aureus* LAC\* background. Subsequently uptake of  
245 radiolabelled glutamine and glutamate was assessed (Fig. 4A-B). No significant differences  
246 in the uptake of these amino acids was observed between WT LAC\* and strain  
247 LAC\*0914::tn, showing that SAUSA300\_0914 does not function as glutamine or glutamate  
248 transporter under our assay conditions.

249 AlsT and SAUSA300\_0914 are members of the amino acid-sodium symporter family of  
250 transporters, which are composed of a single multimembrane spanning protein. Besides this  
251 type of transporter, GlnPQ-type ABC transporters play a major role in glutamine and  
252 glutamate transport in other bacteria (Schuurman-Wolters & Poolman, 2005). *S. aureus*  
253 contains a *glnPQ* (SAUSA300\_1808 - SAUSA300\_1807) operon with *glnP* coding for a  
254 substrate binding domain-permease fusion protein and *glnQ* coding for the cytoplasmic  
255 nucleotide-binding ATPase domain. The results from a previous study suggested that this  
256 transporter functions as glutamine transporter in *S. aureus*, as a *glnP* mutant was more  
257 resistant to the toxic glutamine analogue gamma-L-glutamyl hydrazide (Zhu *et al.*, 2009). To  
258 assess the contribution of the GlnPQ transporter to glutamine and glutamate transport in *S.*  
259 *aureus* under our assay conditions, strain LAC\**glnQ*::tn was generated by transducing the  
260 *glnQ*::tn region from the NMTL strain NE153 (Fey *et al.*, 2013) into the LAC\* background.  
261 The resulting LAC\**glnQ*::tn mutant strain displayed no difference in glutamine or glutamate  
262 uptake compared to WT LAC\* (Fig. 4C-D), indicating that the ABC transporter GlnPQ does  
263 not function as a main glutamate or glutamine transporter under our assay conditions.

264

### 265 **GltS (SAUSA300\_2291) is the main glutamate transporter in *S. aureus***

266 Cellular glutamine levels are key in signalling nitrogen availability in bacterial cells (Fisher,  
267 1999, Gunka & Commichau, 2012). In addition, differences in cellular c-di-AMP levels were  
268 reported in *B. subtilis* depending on the presence of glutamine or glutamate as available  
269 nitrogen source. More specifically, an increase in cellular c-di-AMP levels was observed in  
270 the presence of glutamate as compared to glutamine (Gundlach *et al.*, 2015b). *S. aureus*

271 does not only take up glutamine but also shows robust glutamate uptake (Figs 3 and 4).  
272 However, none of the transporters (AlsT, SAUSA300\_0914 and GlnPQ) investigated so far  
273 plays a major role in glutamate uptake under our growth conditions. In *B. subtilis* GltT,  
274 belonging to the dicarboxylate/amino acid cation symporter (DAACS) family of proteins, is a  
275 major high-affinity Na<sup>+</sup>-coupled glutamate/aspartate symporter and can also mediate the  
276 uptake of glyphosate (Wicke *et al.*, 2019). An additional two paralogs, DctP and GltP are  
277 found in *B. subtilis* of which GltP has also been shown to be a glutamate transporter (Tolner  
278 *et al.*, 1995). The *S. aureus* protein SAUSA300\_2329 (from here on referred to as GltT)  
279 shows a high degree of similarity (52% identity) to the *B. subtilis* GltT protein. In addition, we  
280 identified SAUSA300\_2330 (from here on referred to as GltS) as a potential glutamate  
281 transporter in *S. aureus* due to its similarity to the *E. coli* glutamate permease GltS (e-value:  
282 6e-77; 38% identity) (Deguchi *et al.*, 1990). To test if *S. aureus* GltT or GltS are glutamate  
283 transporters or impact glutamine uptake in *S. aureus*, strains LAC\**gltT::tn* and LAC\**gltS::tn*  
284 were constructed by moving the respective *gltT* and *gltS* transposon insertion regions from  
285 the NMTL strains NE566 and NE560 (Fey *et al.*, 2013) into the LAC\* strain background.  
286 Next, the uptake of radiolabelled glutamine and glutamate was assessed for the WT LAC\*  
287 strain and the LAC\* *gltT::tn* and LAC\* *gltS::tn* mutants. No difference in the uptake of  
288 glutamine was observed between the strains (Fig. 5A) and in the case of LAC\**gltT::tn*, also  
289 no difference in the uptake of glutamate was observed. However, a significant reduction in  
290 glutamate uptake was observed for strain LAC\**gltS::tn* when compared to the WT (Fig. 5B).  
291 The glutamine uptake defect could be restored in a complementation strain harbouring  
292 plasmid pTET-*gltS* allowing for inducible *gltS* expression (Fig. 5C). Indeed, increased  
293 glutamate uptake was observed in the complementation strain, indicating increased *gltS*  
294 expression in the complementation strain as compared to a WT strain. Taken together,  
295 these data reveal that under the growth conditions tested, GltS is the main glutamate  
296 transporter in *S. aureus*.

297 **Glutamine but not glutamate stimulates the growth of *S. aureus* in CDM lacking**  
298 **ammonium as nitrogen source.**

299 Glutamine and glutamate are important amino acids that can serve as nitrogen sources for  
300 the synthesis of many other cellular metabolites. To examine the effect of these amino acids  
301 on the growth of *S. aureus* as well as to evaluate the contribution of the glutamine (*AlsT*) and  
302 glutamate (*GltS*) transporters for growth, growth curves were performed with WT, *alsT::tn*  
303 and *gltS::tn* mutant strains in chemically defined medium (CDM) lacking ammonium and  
304 containing either glutamine (CDM+Gln) or glutamate (CDM+Glu). Reduced growth was seen  
305 when the *S. aureus* strains were grown in glutamate as compared to glutamine containing  
306 medium, suggesting that glutamine but not glutamate can stimulate the growth of *S. aureus*  
307 in CDM lacking ammonium as nitrogen source (Fig. 6A). Consistent with this, the *alsT::tn*  
308 mutant strain, which is deficient in glutamine uptake, showed a similar growth reduction even  
309 if grown in the glutamine-containing medium (CDM+Gln) (Fig. 6A). The observed growth  
310 defect for the *alsT* mutant in CDM+Gln could be restored in the complementation strain  
311 harbouring the plasmid pTET-*alsT* (Fig. 6B). On the other hand, the *gltS::tn* mutant, which is  
312 defective in glutamate uptake, grew similar to the WT strain under all conditions tested,  
313 suggesting that glutamate uptake does not impact the growth of *S. aureus* under the test  
314 conditions. Taken together, these data indicate that glutamine is preferred over glutamate for  
315 the growth of *S. aureus* in CDM lacking ammonium as nitrogen source.

316

317 **Glutamine uptake leads to a reduction in the cellular c-di-AMP levels in *S. aureus***

318 In a previous study, it has been reported that the presence of glutamine or glutamate in the  
319 growth medium can affect cellular c-di-AMP levels in *B. subtilis* and it was proposed that  
320 glutamate uptake leads to an activation of c-di-AMP synthesis in this organism (Gundlach *et*  
321 *al.*, 2015b). To assess if the presence of glutamine or glutamate would also affect c-di-AMP

322 levels in *S. aureus*, the intracellular c-di-AMP concentrations were determined for the WT *S.*  
323 *aureus* strain LAC\* following growth in CDM+Gln or CDM+Glu medium. c-di-AMP levels  
324 were significantly higher in the presence of glutamate as compared to glutamine (Fig. 7A).  
325 As previously reported (Corrigan *et al.*, 2011), in the absence of the c-di-AMP  
326 phosphodiesterase GdpP (strain LAC\**gdpP::kan*) c-di-AMP levels were increased as  
327 compared to a WT strain (Fig. 7A). Interestingly and similar as observed for the WT strain, c-  
328 di-AMP levels were also higher in the *gdpP* mutant strain in the presence of glutamate as  
329 compared to glutamine. This indicates that the observed regulation of c-di-AMP synthesis  
330 depending on the presence of glutamine or glutamate is at the level of synthesis and not  
331 degradation. To test if glutamine uptake inhibits or glutamate uptake activates c-di-AMP  
332 production, c-di-AMP levels were also determined for the *alsT::tn* and *gltS::tn* mutants, which  
333 are defective in glutamine or glutamate uptake, respectively. Following growth in glutamate  
334 containing medium, all strains produced high and comparable levels of c-di-AMP (Fig. 7B  
335 white columns). However, some variation in the relative c-di-AMP levels produced by the  
336 *gltS* mutant compared to the WT strain was observed between experiments (Fig. 7B white  
337 columns and Fig. S3). The reason for this is currently not known. But taken together, our  
338 data suggest that the ability of *S. aureus* to take up glutamate does not drastically affect c-di-  
339 AMP production. On the other hand, clear differences in c-di-AMP levels were observed for  
340 strain *alsT::tn*, which is unable to take up glutamine. The WT and the *gltS::tn* mutant strains  
341 produced low c-di-AMP amounts following growth in CDM+Gln, while the c-di-AMP levels  
342 remained high in strain *alsT::tn*. (Fig. 7B grey columns and Fig. S3), suggesting that  
343 glutamine uptake inhibits c-di-AMP production. The c-di-AMP levels in the *alsT* mutant strain  
344 could be restored back to WT levels in the complementation strain harbouring plasmid  
345 pTET-*alsT* (Fig. 7C). Taken together, these results highlight that glutamine uptake blocks c-  
346 di-AMP production in *S. aureus* and that eliminating glutamine from the medium or  
347 preventing its uptake stimulates c-di-AMP production. Such an activation is likely achieved  
348 through stimulating the activity of the c-di-AMP cyclase DacA, rather than preventing its  
349 degradation by GdpP and possible mechanisms for this will be discussed.

## 350 Discussion

351  
352 Under standard laboratory growth conditions, c-di-AMP is essential for growth in many  
353 bacteria (Mehne *et al.*, 2013, Corrigan *et al.*, 2015, Woodward *et al.*, 2010, Gundlach *et al.*,  
354 2015a), but the exact molecular mechanisms behind this have remained unclear. Here we  
355 have shown that inactivation of OpuD likely helps a *S. aureus* c-di-AMP null strain survive by  
356 allowing bacteria to re-establish their osmotic balance. Bacteria unable to produce c-di-AMP  
357 are larger than WT cells but bacteria that are unable to produce c-di-AMP and also lack  
358 OpuD, the main transporter for the osmolyte glycine betaine in *S. aureus*, are similar in size  
359 to WT bacteria. This indicates that in these cells the osmotic balance has been restored.  
360 Furthermore, we show that mutations in *alsT*, which we identify as part of this study to  
361 encode for the main glutamine transporter in *S. aureus*, suppress the essentiality of c-di-  
362 AMP in a different way and potential mechanisms for this are discussed here.

363 Over the last decade, considerable evidence has emerged that c-di-AMP plays a  
364 major role in osmotic regulation, primarily by positively regulating potassium export or  
365 negatively regulating potassium and osmolyte uptake (Rocha *et al.*, 2019, Quintana *et al.*,  
366 2019, Kim *et al.*, 2015, Corrigan *et al.*, 2013, Moscoso *et al.*, 2015, Chin *et al.*, 2015, Huynh  
367 *et al.*, 2016, Schuster *et al.*, 2016, Pham & Turner, 2019, Pham *et al.*, 2018, Devaux *et al.*,  
368 2018, Zarrella *et al.*, 2018, Gundlach *et al.*, 2017b, Gundlach *et al.*, 2017a, Gundlach *et al.*,  
369 2017c, Gundlach *et al.*, 2019). However, individual c-di-AMP target proteins identified thus  
370 far are themselves not essential. Therefore, the essentiality of c-di-AMP is likely due to its  
371 ability to regulate multiple target proteins simultaneously. Furthermore, in the absence of this  
372 molecule, many transporters are activated rather than inactivated, likely leading to  
373 accumulation of toxic levels of metabolites, such as potassium and osmolytes. Consistent  
374 with this idea, inactivating mutations in potassium uptake systems, oligopeptide and  
375 osmolyte transporters have been reported to rescue the growth defect of bacteria unable to  
376 produce c-di-AMP (Whiteley *et al.*, 2015, Whiteley *et al.*, 2017, Gundlach *et al.*, 2017b,  
377 Gundlach *et al.*, 2017c, Pham *et al.*, 2018, Devaux *et al.*, 2018, Zeden *et al.*, 2018). We  
378 have previously shown that in *S. aureus* inactivation of the main glycine betaine transporter

379 OpuD bypasses the requirement of c-di-AMP for the growth of *S. aureus* in rich medium  
380 (Zeden *et al.*, 2018). Using bacterial cell size as a proxy for the osmotic balance of cells, we  
381 show here that inactivation of OpuD likely helps an c-di-AMP null strain survive by allowing  
382 bacteria to re-establish their osmotic balance, as *dacA/opuD* mutant bacteria, which cannot  
383 produce c-di-AMP but are also lacking the main glycine betaine transport, are similar in size  
384 to WT bacteria (Fig. 1). Here it is interesting to note that while the carnitine osmolyte  
385 transporter OpuCA has been shown to be a direct target of c-di-AMP in both *S. aureus* and  
386 *L. monocytogenes* (Huynh *et al.*, 2016, Schuster *et al.*, 2016), no direct interaction between  
387 OpuD or any other glycine-betaine transporter and c-di-AMP has been reported for *S.*  
388 *aureus*. Hence, it remains unclear if glycine betaine osmolyte transport is directly  
389 regulated by c-di-AMP in *S. aureus* and hence the absence of c-di-AMP leads to an excess  
390 in glycine-betaine uptake and therefore inactivation of OpuD prevents such excess in  
391 uptake. Or alternatively, only potassium and carnitine uptake might be increased in the  
392 absence of c-di-AMP since transporters of these molecules are direct targets of c-di-AMP,  
393 and glycine betaine uptake remains unaffected but becomes toxic upon accumulation of  
394 potassium and carnitine. Therefore, it remains to be determined if the observed increase in  
395 cell size in the absence of c-di-AMP is solely caused by an increase in potassium transport  
396 by the Ktr, Kpd and potentially KimA systems and carnitine osmolyte transport by OpuCA or  
397 if also glycine betaine transport is directly affected by cellular c-di-AMP levels in *S. aureus*. A  
398 direct role for c-di-AMP in the control of glycine betaine or betaine transporters has been  
399 proposed for other bacteria where c-di-AMP binds to the transcriptional regulator BusR,  
400 which controls the expression of the predicted glycine betaine or betaine transporter BusAB  
401 (Devaux *et al.*, 2018, Pham *et al.*, 2018). However, such a system does not appear to be  
402 present in *S. aureus*.

403 Bacteria of the *dacA/alsT* suppressor strain, which survive in the absence of c-di-  
404 AMP, remained enlarged, indicating that the essentiality of c-di-AMP is bypassed in this  
405 strain through a different mechanism. Here, we show that AlsT is the main glutamine  
406 transporter in *S. aureus* (Fig. 3). Glutamine as well as proline accumulate under NaCl stress



407 conditions in *S. aureus*, indicating that glutamine also plays an important role in osmotic  
408 regulation (Anderson & Witter, 1982). However, under the osmotic stress conditions tested  
409 in this previous study, glutamine accumulation was proposed to be due to synthesis rather  
410 than uptake (Anderson & Witter, 1982). In terms of other functions of the glutamine  
411 transporter AlsT in *S. aureus*; it is interesting to note that in a recent study investigating  
412 genetic determinants required for eDNA during biofilm formation, it was found that  
413 inactivation of GdpP as well as AlsT results in a significant decrease in eDNA release  
414 (DeFrancesco *et al.*, 2017). Since we show here that in an *alsT* mutant, which is unable to  
415 import glutamine, cellular c-di-AMP levels can be significantly higher as compared to a WT  
416 strain (Fig. 7), similar to a *gdpP* mutant, this could mean that the underlying mechanistic  
417 bases for the decrease in eDNA release observed for the *gdpP* and *alsT* mutant strains  
418 might be related.

419         There are several (not mutually exclusive) possibilities how preventing glutamine  
420 uptake could rescue the growth of a c-di-AMP null strain (Fig. 8). The cellular  
421 glutamine/glutamate ratio serves as a key indicator of nitrogen availability in bacterial cells  
422 with a high glutamine/glutamate ratio indicating nitrogen availability (Forchhammer, 2007).  
423 The cellular glutamate concentration is usually higher than the glutamine concentration and  
424 excess glutamine can be readily converted to glutamate via the GOGAT pathway by the  
425 glutamine oxoglutarate aminotransferase composed in *S. aureus* of the GltB and GltD  
426 proteins subunits (Gunka & Commichau, 2012). Hence, glutamine uptake and its availability  
427 in the cell will provide a flux towards glutamate synthesis and glutamate is the counterion of  
428 potassium in the cell. Therefore, glutamine uptake and its conversion to glutamate could  
429 indirectly facilitate further potassium uptake, which becomes toxic in a c-di-AMP null strain,  
430 in which potassium influx is already increased. As a result, reduction in glutamine uptake, as  
431 observed in the *alsT* mutant, and preventing its flux to glutamate, could also prevent the  
432 intoxication of cells with potassium.

433         As stated above, a high glutamine/glutamate ratio indicates nitrogen availability and  
434 in the absence of other limitations, this will boost the general metabolism of bacterial cells

435 (see Model Fig. 8). In a study on *L. monocytogenes*, an increased flux of pyruvate into the  
436 TCA cycle has been described for bacteria unable to produce c-di-AMP (Sureka *et al.*,  
437 2014). As a consequence of this increased TCA cycle activity, an accumulation of citrate and  
438 increased carbon flux into glutamine and glutamate was observed (Sureka *et al.*, 2014). Of  
439 note, the authors did not distinguish between glutamine and glutamate in this study (Sureka  
440 *et al.*, 2014). This provided experimental evidence that a decrease in c-di-AMP levels leads  
441 to increased TCA cycle activity and accumulation of cellular metabolites such as citrate and  
442 glutamine/glutamate. The essentiality of c-di-AMP in *L. monocytogenes* could be reversed  
443 by mutating *citZ*, coding for the citrate synthase, which prevented the accumulation of high  
444 levels of citrate as well as glutamine and glutamate pool (again analyzed as a combined  
445 pool) in bacterial cells (Sureka *et al.*, 2014). Perhaps similar to the observations in *L.*  
446 *monocytogenes*, the absence of c-di-AMP could also boost the metabolism and potentially  
447 TCA cycle activity in *S. aureus*. As part of this study, we provide evidence that in *S. aureus*  
448 glutamine is preferred over glutamate for growth in CDM lacking ammonium as nitrogen  
449 source. The growth of an *S. aureus* strain in this glucose-containing but ammonium free  
450 medium was improved by the addition of glutamine but not glutamate and the uptake of  
451 glutamine mediated by AlsT was required for this growth improvement (Fig. 6). Hence, the  
452 lack of c-di-AMP combined with glutamine uptake could fuel the bacterial metabolism and  
453 the resulting metabolic imbalance might become toxic to the cell, similar as observed for *L.*  
454 *monocytogenes* (Sureka *et al.*, 2014, Whiteley *et al.*, 2017). This futile cycle might be  
455 blocked by preventing glutamine uptake and reducing the metabolic activity of cells.

456 The actual stimuli and underlying molecular mechanisms that regulate c-di-AMP  
457 production in bacterial cells are at the moment poorly understood. As part of this study, we  
458 show that glutamine uptake negatively impacts c-di-AMP production in *S. aureus* and  
459 bacteria grown in medium lacking glutamine or inactivated for the main glutamine transporter  
460 AlsT have significantly increased cellular c-di-AMP levels (Fig. 7B and 7C). The increase in  
461 c-di-AMP production in the absence of glutamine uptake is likely achieved by activation of  
462 the c-di-AMP cyclase DacA and not inhibition of the c-di-AMP phosphodiesterase GdpP, as

463 an increase in cellular c-di-AMP levels was also detected in a *gdpP* mutant strain when  
464 grown in medium lacking glutamine (Fig. 7A). Current evidence suggests that the activity of  
465 DacA can be regulated through the interaction with two proteins: the membrane anchored  
466 regulator protein YbbR (also name CdaR in other bacteria) and the phosphoglucomutase  
467 enzyme GlmM (Tosi *et al.*, 2019, Zhu *et al.*, 2016, Gundlach *et al.*, 2015b, Pham *et al.*,  
468 2016) (see Model Fig. 8). YbbR and GlmM are encoded in the same operon with DacA.  
469 GlmM converts glucosamine-6-P to glucosamine-1-P, an essential precursor for UDP-  
470 GlcNAc production and hence peptidoglycan synthesis. GlmM can block the c-di-AMP  
471 cyclase activity of DacA through a direct interaction (Tosi *et al.*, 2019, Zhu *et al.*, 2016).  
472 Glutamine is a key precursor for the production of the GlmM substrate glucosamine-6-P  
473 since it and fructose-6-P are converted by GlmS to glutamate and glucosamine-6-P.  
474 Therefore, the cellular glutamine levels will impact GlmS activity and hence also the  
475 availability of the GlmM substrate, which could in turn impact the ability of GlmM to interact  
476 with DacA. Based on our findings that c-di-AMP levels are increased in the absence of  
477 glutamine in the medium or in the *alsT* mutant would suggest that low glutamine levels  
478 would prevent an interaction between GlmM and DacA, resulting in an increase in c-di-AMP  
479 production. *Vice versa*, high glutamine level could stimulate the interaction between GlmM  
480 and DacA and in this manner reduce c-di-AMP production and perhaps stimulate the  
481 bacterial metabolism (Fig. 8). In other bacteria it has been reported that YbbR can,  
482 depending on the growth conditions, either act as an activator or repressor of DacA (Mehne  
483 *et al.*, 2013, Rismondo *et al.*, 2016). It is thought that this regulation is achieved through a  
484 direct interaction between the membrane spanning helix of YbbR and the transmembrane  
485 domain in DacA (Gundlach *et al.*, 2015b). YbbR has an extracellular sensor domain, which  
486 could respond to changes in the peptidoglycan structure (e.g. caused by changes in  
487 glutamine levels and flux of precursors towards peptidoglycan synthesis) or alternatively  
488 biophysical changes in the membrane bilayer depending on osmotic status and/or nitrogen  
489 availability. In this manner the availability of glutamine and resulting cellular changes could  
490 also be sensed by YbbR and transduced to DacA (Fig. 8).

491 Taken together, with this work, we provide a further connection between the c-di-  
492 AMP signalling network and osmotic regulation in *S. aureus* but also to central nitrogen  
493 metabolism. It will be interesting to determine in future studies the mechanistic bases for the  
494 observed changes in cellular c-di-AMP levels depending on glutamine uptake and the  
495 involvement of GlmM and YbbR in this process.

496

## 497 **Experimental Procedures**

### 498 **Bacterial strains and culture conditions**

499 Bacterial strains used in this study are listed in Table 1. *S. aureus* strains were grown in  
500 Tryptic Soy Broth (TSB), Tryptic Soy Agar (TSA) or Chemically Defined Medium (CDM).  
501 CDM was prepared as described previously (Zeden *et al.*, 2018). Where indicated, certain  
502 amino acids were removed from the CDM recipe during uptake assays and when needed  
503 the TSB was supplemented with 0.4 M NaCl. An ammonium free chemically defined  
504 medium, CDM+Glu, was prepared the same way as CDM containing the standard glutamine  
505 concentration of 100 mg/L but lacking ammonium sulphate and CDM+Gln was prepared the  
506 same way as CDM+Glu but replacing the glutamate with 100 mg/ L glutamine. *Escherichia*  
507 *coli* strains were grown in Lysogeny Broth (LB). Where appropriate, antibiotics and/or  
508 inducers were added to the media at the following concentration: 200 ng/ml  
509 anhydrotetracycline (Atet), 90 µg/ml Kanamycin (Kan), 10 µg/ml Erythromycin (Erm), 7.5 or  
510 10 µg/ml Chloramphenicol (Cam), Ampicillin (Amp) 100 µg/ml.

511

### 512 **Bacterial strain construction**

513 All strains used in this study are listed in Table 1 and primers used in this study are listed in  
514 Table 2. The transposon insertion sites in the Nebraska transposon mutant library (NTML)  
515 strains (Fey *et al.*, 2013) used as part of this study were confirmed by PCR and sequencing.  
516 The transposon and surrounding region were also moved by phage transduction using  
517 phage 85 into the *S. aureus* LAC\* strain background. This resulted in the generation of *S.*  
518 *aureus* strains LAC\**alsT::tn* (SAUSA300\_1252::tn; ANG4803), LAC\*0914::tn

519 (SAUSA300\_0914::tn; ANG5141), LAC\**glnQ*::tn (SAUSA300\_0914::tn; ANG5070),  
520 LAC\**gltT*::tn (SAUSA300\_1252::tn; ANG5366) and LAC\**gltS*::tn (SAUSA300\_2291::tn;  
521 ANG5367). The transposon insertion in the respective gene was again confirmed by PCR  
522 and sequencing. For complementation analysis, the Atet inducible single copy integration  
523 plasmids piTET-*alsT* and piTET-*gltS* were constructed. To this end, *alsT* (SAUSA300\_1252)  
524 and *gltS* (SAUSA300\_2291) were amplified using LAC\* chromosomal DNA and primers  
525 ANG2250/ANG2251 and ANG3209/ANG3210, respectively. The products as well as piTET  
526 were digested with AvrII and SacII and then ligated. Plasmid piTET-*alsT* was recovered in *E.*  
527 *coli* strain XL1-Blue (yielding strain ANG3937), shuttled through *E. coli* strain IM08B (strain  
528 ANG3955) and then introduced into LAC\**alsT*::tn (ANG4803), yielding strain LAC\**alsT*::tn  
529 piTET-*alsT* (ANG4854). As a control, plasmid piTET was also introduced into LAC\**alsT*::tn  
530 (ANG4803) yielding strain LAC\**alsT*::tn piTET (ANG4853). Plasmid piTET-*gltS* was  
531 transformed into *E. coli* XL1-Blue (yielding strain ANG5494), shuttled through *E. coli* IM08B  
532 (yielding strain ANG5495) and transformed into LAC\**gltS*::tn, yielding the complement strain  
533 LAC\**gltS*::tn piTET-*gltS* (ANG5493). As a control, the piTET plasmid was transformed into  
534 LAC\**gltS*::tn strain, yielding the strain LAC\**gltS*::tn piTET (ANG5492). Correct plasmid  
535 integration into the *geh* locus was confirmed by PCR and the sequences of all plasmid  
536 inserts were confirmed by fluorescent automated sequencing.

537

### 538 **Bacterial growth curves and amino acid analysis in culture supernatants**

539 *S. aureus* strains LAC\* and LAC\**alsT*::tn were grown overnight in TSB supplemented with  
540 10 µg/ml erythromycin where appropriate. Overnight cultures were then diluted to an OD<sub>600</sub>  
541 of 0.01 into 50 ml of fresh TSB. Cultures were incubated at 37°C with aeration, and OD<sub>600</sub>  
542 values determined every hour. The experiment was performed with three biological  
543 replicates and the average OD<sub>600</sub> values and standard deviations were plotted. Using the  
544 same cultures, supernatant samples were prepared at time 0, 6, 10 and 12 h after growth  
545 and amino acid levels determined as previously described using an amino acid analyser  
546 (Halsey *et al.*, 2017). For measuring the growth of *S. aureus* strains LAC\*, LAC\* piTET,

547 LAC\**alsT::tn*, LAC\**alsT::tn* piTET, LAC\**alsT::tn* piTET-*alsT*, LAC\**gltS::tn* in CDM+Gln and  
548 CDM+Glu, the bacteria were grown overnight in TSB medium supplemented with  
549 chloramphenicol and erythromycin where appropriate. Next day, bacteria from a 1 ml aliquot  
550 were washed twice in PBS and diluted to OD<sub>600</sub> of 0.005 in either CDM-Glu or CDM+Gln  
551 supplemented with 200 ng/ml Atet were indicated. One hundred µl of the diluted cultures (6  
552 technical replicates) were transferred into well of a 96-well plate and the plate was then  
553 incubated with shaking (500 rpm) in a plate reader and OD<sub>600</sub> measured every 30 min. The  
554 experiment was performed with three biological replicates and one representative graph is  
555 shown.

556

### 557 **Microscopic analysis and cell size measurements**

558 Microscopic analysis to determine bacterial cell sizes was performed essentially as  
559 previously described (Zeden *et al.*, 2018). Briefly, *S. aureus* strains LAC\*, LAC\**dacA::kan*,  
560 LAC\**dacA*<sub>G206S</sub>, LAC\**dacA/opuD* (ANG3835) and LAC\**dacA/alsT* (ANG3838) were grown  
561 overnight at 37°C in TSB or TSB supplemented with 0.4 M NaCl where stated. Next day, the  
562 cultures were diluted to an OD<sub>600</sub> of 0.01 and grown for 3 hours at 37°C. 100 µl of these  
563 cultures were then stained for 20 min at 37°C with Vancomycin-BODIPY FL at a final  
564 concentration of 2 µg/ml. 1.5 µl of each sample was spotted onto a thin 1.5% agarose gel  
565 patch prepared in H<sub>2</sub>O or in 0.4 M NaCl and the bacteria subsequently imaged at 1000 x  
566 magnification using an Axio Imager A2 Zeiss microscope equipped with a GFP filter set.  
567 Images were acquired using the ZEN 2012 (blue edition) software. The bacterial cell  
568 diameters were determined using the Fiji software. Only non-dividing cells (cells without any  
569 obvious fluorescent dots or lines at the mid-cell), were used for cell diameter measurements.  
570 The cell diameters of 50 cells were measured and the average cell diameter determined.  
571 The experiment was conducted with three or four biological replicates (as indicated in the  
572 figure legend) and the averages and standard deviations of the average cell diameters  
573 plotted.

574

## 575 Uptake assays using <sup>14</sup>C-labelled amino acids

576 Uptake assays were conducted as previously described with some minor modifications  
577 (Zeden *et al.*, 2018). Briefly, *S. aureus* strains were streaked on TSA or TSA 0.4M NaCl  
578 plates with appropriate antibiotics and the plates incubated overnight at 37°C. Bacteria were  
579 subsequently scraped off from the plates and suspended in 1 ml PBS pH 7.4 buffer and the  
580 OD<sub>600</sub> determined. Fifty ml of CDM (where indicated with 200 ng/ml of the inducer Atet  
581 added) was inoculated with the appropriate bacterial suspensions to an OD<sub>600</sub> of 0.05. The  
582 cultures were grown at 37°C to an OD<sub>600</sub> between 0.4 and 0.9 and then bacteria from an  
583 OD<sub>600</sub> equivalent of 8 were harvested by centrifugation for 10 min at 19,000 x g at RT.  
584 Supernatants were discarded and the bacterial pellets were suspended in 2 ml of CDM  
585 without glutamate (for glutamine and glutamate uptake assays), CDM without serine (for  
586 serine uptake assays). The OD<sub>600</sub> of the cell suspensions were measured and the cells  
587 diluted to an OD<sub>600</sub> of approximately 1. The OD<sub>600</sub> was re-measured and this measurement  
588 used for normalization purposes. Five hundred and fifty µl of these cell suspensions were  
589 aliquoted into 50 ml conical tubes and 100 µl used to measure the background radiation, by  
590 filtering the cells onto a nitrocellulose membrane filter, followed by a wash step with 16 ml  
591 PBS. Then, 6.2 µl of Glutamine, L-[<sup>14</sup>C(U)] (Hartmann Analytic, MC1124), Glutamic acid, L-  
592 [<sup>14</sup>C(U)] (Hartmann Analytic, MC156), or serine L-[<sup>14</sup>C(U)] (Hartmann Analytic, MC265)  
593 was added to the remaining 450 µl sample. Hundred µl aliquots were filtered at 0, 3, 6 and 9  
594 minutes and the filters were then washed with 2 x 16 ml of PBS pH 7.4. The filters were  
595 subsequently dissolved in 9 ml of scintillation cocktail Filter Count (Perkin Elmer) and the  
596 radioactivity measured in counts per minute (CPM) using a Wallac 1409 DSA liquid  
597 scintillation counter. CPM for each sample were then normalized by the OD<sub>600</sub> of the final cell  
598 suspension and the means and standard deviations of the CPM/ml OD<sub>600</sub> = 1 of three or four  
599 (as indicated in the figure legends) independent experiments were plotted.

600

601

602



603 **Determination of cellular c-di-AMP levels by competitive ELISA.**

604 Intracellular c-di-AMP levels in WT LAC<sup>\*</sup> and the indicated *S. aureus* mutant strains were  
605 determined using a previously described competitive ELISA method (Underwood *et al.*,  
606 2014) and a slightly modified method for the preparation of *S. aureus* samples (Bowman *et*  
607 *al.*, 2016). Briefly, a single colony of the WT and different *S. aureus* mutant strains were  
608 picked from TSA plates and used to inoculate 5 ml of either CDM+Gln or CDM+Glu and the  
609 cultures were incubated for 18 h at 37°C with shaking. Next, bacteria from 4.5 ml culture  
610 were collected by centrifugation, washed three times with PBS and subsequently suspended  
611 in 0.75 to 1 ml 50 mM Tris pH 8 buffer supplemented with 20 ng/ml lysostaphin and the cells  
612 were lysed by bead beating. The lysates were cleared by centrifugation for 5 min at 17,000 x  
613 g and the supernatant transferred to a new tube. A small sample aliquot was removed, and  
614 the protein concentration determined using a Pierce BCA protein assay kit for normalization  
615 purposes (Thermo Scientific, Waltham, MA, USA). The remainder of the sample was heated  
616 to 95°C for 10 min. For the ELISA assay, the samples were diluted to a protein concentration  
617 of 100, 200, 400 or 500 µg/ml as, appropriate. ELISA plates were prepared by adding 100 µl  
618 of coating buffer (50 mM Na<sub>2</sub>CO<sub>3</sub>, 50 mM NaHCO<sub>3</sub>, pH 9.6) containing 10 µg/ml of the c-di-  
619 AMP binding CpaA<sub>SP</sub> protein to each well of a NUNC MaxiSorp 96 well plate (Thermo  
620 Scientific, Waltham, MA, USA) and the plate was incubated for approximately 18 h at 4°C.  
621 Next, the plate was washed three times with 200 µl PBST pH 7.4 (10 mM Na<sub>2</sub>HPO<sub>4</sub>, 1.8 mM  
622 KH<sub>2</sub>PO<sub>4</sub> 137 mM NaCl, 2.7 mM KCl, 0.05% (v/v) Tween 20), blocked for 1 h at 18°C with  
623 150 µl blocking solution (1% BSA in PBS pH 7.4) and washed three times with 200 µl PBST.  
624 Fifty µl of the samples (three biological replicates and three technical replicates) or  
625 standards (two technical replicates) were mixed with 50 µl of a 50 nM biotinylated c-di-AMP  
626 solution prepared in 50 mM Tris pH 8 buffer. For the standard curve, c-di-AMP standards  
627 were prepared in 50 mM Tris pH 8 buffer at concentrations of 0, 12.5, 25, 37.5, 50, 75, 100,  
628 200 nM. Following the addition of the samples and the standards, the plate was incubated  
629 for 2 h at 18°C and then washed three times with PBST. Next, 100 µl of a high sensitivity  
630 streptavidin-HRP solution (Thermo Scientific, Waltham, MA, USA) diluted 1:500 in PBS was

631 added to each well and the plate was incubated for 1 h at 18°C. The plate was washed  
632 again 3 x with 200 µl PBST and 100 µl of a developing solution (0.103 M NaHPO<sub>4</sub>, 0.0485 M  
633 citric acid, 500 mg/l o-phenylenediamine dihydrochloride, 0.03% H<sub>2</sub>O<sub>2</sub>) was added to each  
634 well and the plate incubated for 15 min at 18°C. The reaction was then stopped by adding  
635 100 µl of 2 M H<sub>2</sub>SO<sub>4</sub> solution. The absorbance was measured in a plate reader at a  
636 wavelength of 490 nm and c-di-AMP concentrations were calculated as ng c-di-AMP / mg  
637 protein.

638

639 **Acknowledgments:** This work was funded by the Wellcome Trust grants 100289/Z/12/Z  
640 and 210671/Z/18/Z to AG and the NIH/NIAID grants P01AI083211 and R01AI125588 to  
641 P.D.F. MSZ was supported by a Medical Research Council Centre for Molecular  
642 Bacteriology and Infection (MRC CMBI) studentship. The funders had no role in the study  
643 design, data collection and interpretation, or the decision to submit the work for publication.

644

645 **Author contribution:** MSZ, IK and AG design the study, MSZ and IK acquired the data,  
646 MSZ, IK, VTC, PF and AG, designed experiments, analyzed and interpreted the data, MSZ,  
647 IK and AG prepared the figures and writing of the manuscript. All authors approved the final  
648 version of the manuscript.

649

650

651 **Graphical abstract:**  
652

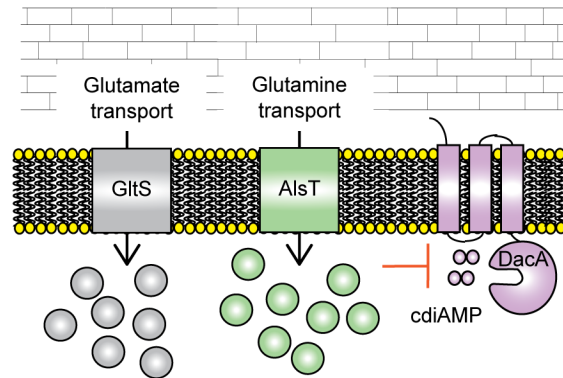

653  
654  
655

656 **Abbreviated Summary:**

657 A large number of amino acid transporters and oligopeptide permeases are encoded in  
658 bacterial genomes. However, their actual substrate specificity and functions are hard to  
659 predict bioinformatically. In this study, we report that GltS and AlsT are main glutamate and  
660 glutamine transporters in *Staphylococcus aureus*, respectively and show that glutamine  
661 uptake inhibits the production of the nucleotide signalling molecule c-di-AMP.

662

663 **Table 1:** Bacterial strains used in this study

| Unique ID                                   | Strain name and resistance                         | Source                          |
|---------------------------------------------|----------------------------------------------------|---------------------------------|
| <b><i>Escherichia coli</i> strains</b>      |                                                    |                                 |
| ANG284                                      | XL1-Blue pTET; AmpR                                | (Gründling & Schneewind, 2007)  |
| ANG2154                                     | DH10B pIMAY; CamR                                  | (Monk <i>et al.</i> , 2012)     |
| ANG3724                                     | IM08B                                              | (Monk <i>et al.</i> , 2015)     |
| ANG3928                                     | IM08B pTET; AmpR                                   | (Zeden <i>et al.</i> , 2018)    |
| ANG3937                                     | XL1-Blue pTET- <i>alsT</i> ; AmpR                  | This study                      |
| ANG3955                                     | IM08B pTET- <i>alsT</i> ; AmpR                     | This study                      |
| ANG5494                                     | XL1-Blue pTET- <i>gltS</i> ; AmpR                  | This study                      |
| ANG5495                                     | IM08B pTET- <i>gltS</i> ; AmpR                     | This study                      |
| <b><i>Staphylococcus aureus</i> strains</b> |                                                    |                                 |
| AH1263                                      | LAC* Erm sensitive CA-MRSA USA300 strain (ANG1575) | (Boles <i>et al.</i> , 2010)    |
| ANG1961                                     | LAC* <i>gdpP::kan</i> ; KanR                       | (Corrigan <i>et al.</i> , 2011) |
| ANG3664                                     | LAC* <i>dacA<sub>G206S</sub></i> ; KanR            | (Bowman <i>et al.</i> , 2016)   |
| ANG3666                                     | LAC* <i>dacA::kan (dacA)</i> KanR                  | (Zeden <i>et al.</i> , 2018)    |
| ANG3835                                     | LAC* <i>dacA::kan-S7 (LAC*dacA/opuD)</i> ; KanR    | (Zeden <i>et al.</i> , 2018)    |
| ANG3838                                     | LAC* <i>dacA::kan-S10 (LAC*dacA/alsT)</i> ; KanR   | (Zeden <i>et al.</i> , 2018)    |
| ANG3940                                     | NE142 ( <i>alsT::tn</i> ) – NMTN strain            | (Fey <i>et al.</i> , 2013)      |
| ANG4054                                     | LAC* pTET; CamR                                    | (Zeden <i>et al.</i> , 2018)    |
| ANG4803                                     | LAC* <i>alsT::tn</i> ; ErmR                        | This study                      |
| ANG4854                                     | LAC* <i>alsT::tn</i> pTET- <i>alsT</i> ; ErmR CamR | This study                      |
| ANG4853                                     | LAC* <i>alsT::tn</i> piTE ; ErmR CamR              | This study                      |
| ANG4968                                     | NE1463 (JE2 SAUSA300_0914::tn) – NMTN strain       | (Fey <i>et al.</i> , 2013)      |
| ANG5070                                     | NE153 (JE2 <i>glnQ::tn</i> ) – NMTN strain         | (Fey <i>et al.</i> , 2013)      |
| ANG5141                                     | LAC*0914::tn; ErmR                                 | This study                      |
| ANG5242                                     | LAC* <i>glnQ::tn</i> ; ErmR                        | This study                      |
| ANG5309                                     | NE566 (JE2 <i>gltT::tn</i> ) – NMTN strain         | (Fey <i>et al.</i> , 2013)      |
| ANG5310                                     | NE560 (JE2 <i>gltS::tn</i> ) – NMTN strain         | (Fey <i>et al.</i> , 2013)      |
| ANG5366                                     | LAC* <i>gltT::tn</i> ; ErmR                        | This study                      |
| ANG5367                                     | LAC* <i>gltS::tn</i> ; ErmR                        | This study                      |
| ANG5492                                     | LAC* <i>gltS::tn</i> pTET; ErmR CamR               | This study                      |
| ANG5493                                     | LAC* <i>gltS::tn</i> pTET- <i>gltS</i> ; ErmR CamR | This study                      |

664

665

666 **Table 2:** Cloning primers used in this study

| Primer ID | Name                 | Sequence                                 |
|-----------|----------------------|------------------------------------------|
| ANG2250   | 5-AvrII- <i>alsT</i> | AGTCCCTAGGCGGTCTAATTTTATAGAAGG           |
| ANG2251   | 3-SacII- <i>alsT</i> | TCCCCGCGGGGTTTATTTGATTTTATATAATGAATCG    |
| ANG3209   | 5-AvrII- <i>gltS</i> | ATACCTAGGAGGGAGAGGGATATTCAACAAGGGGGATTG  |
| ANG3210   | 3-SacII- <i>gltS</i> | GCCCGCGGTTTAACTAAACCATTGTATGAATCCCATAATG |

667

668 **Figures and Legends**

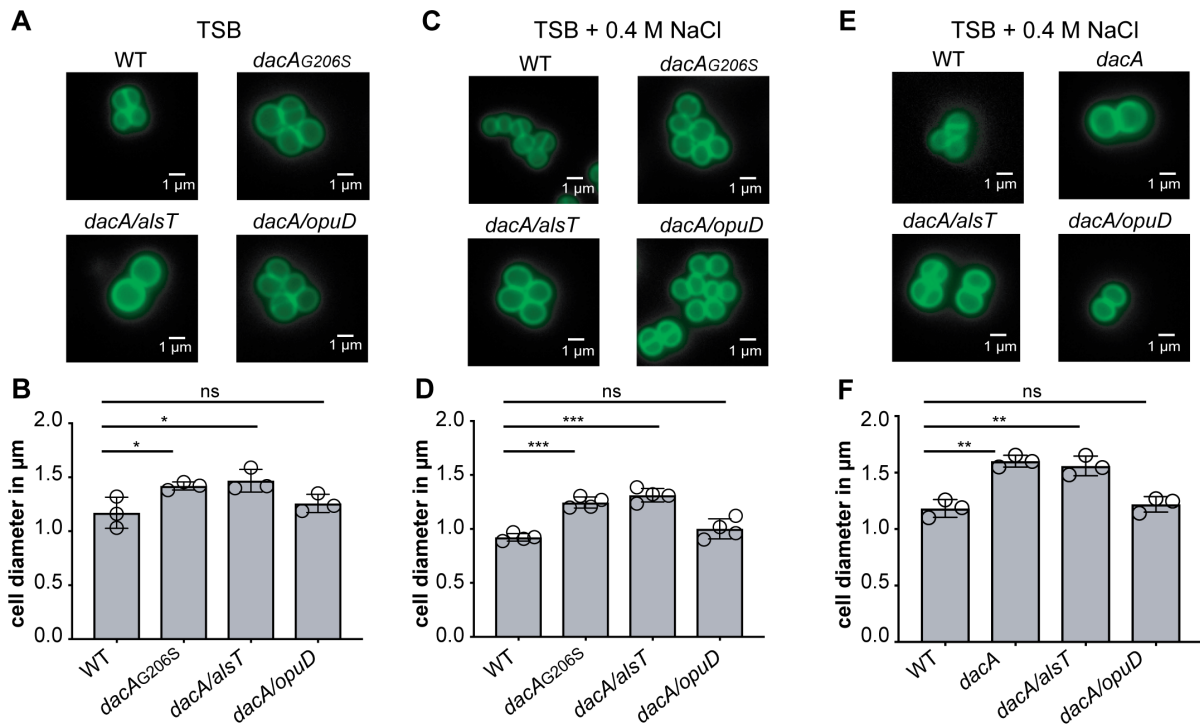

669

670 **FIG 1: Inactivation of the glycine betaine transporter OpuD rescues the cell size of *S.***

671 ***aureus dacA* mutant bacteria.** (A, C, E) Microscopy images of *S. aureus* cells stained with

672 fluorescently labelled vancomycin. Cultures of *S. aureus* LAC<sup>+</sup> (WT), LAC<sup>+</sup>*dacA*<sub>G206S</sub>

673 (*dacA*<sub>G206S</sub>) (panels A and C only), LAC<sup>+</sup>*dacA::kan* (*dacA*) (panel E only) and the suppressor

674 strains LAC<sup>+</sup>*dacA/alsT* (*dacA/alsT*) and LAC<sup>+</sup>*dacA/opuD* (*dacA/opuD*) were grown in (A)

675 TSB or (C and E) TSB 0.4 M NaCl medium and subsequently stained with fluorescently

676 labelled vancomycin. The bacteria were then viewed using a fluorescent microscope and

677 representative images are shown. Scale bars are 1  $\mu\text{m}$ . (B, D, F) Bacterial cell diameter

678 measurements. The diameter of non-dividing bacterial cells was measured as described in

679 the Materials and Method section for *S. aureus* strains grown in (B) TSB or grown in (D and

680 F) TSB 0.4 M NaCl medium. The diameters of 50 cells were determined and the average

681 diameter calculated. The experiment was performed in triplicate (B and F) or quadruplicate

682 (D) and the averages and SD of the average cell diameters plotted. For statistical analysis,

683 one-way ANOVA followed by Dunnett's multiple comparison tests were performed (ns = not

684 significant, \* =  $p < 0.01$ , \*\* =  $p < 0.001$ , \*\*\* =  $p < 0.0001$ ).

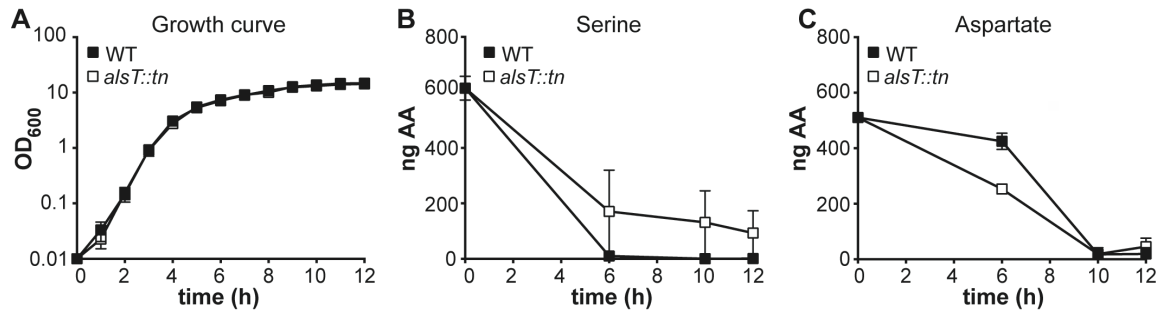

685

686

687

**FIG 2: Amino acid uptake analysis to determine the function of AlsT. (A)** Bacterial

688

growth curves. *S. aureus* strains LAC\* (WT) and LAC\**alsT::tn* (*alsT::tn*) were grown in TSB

689

medium and OD<sub>600</sub> readings determined at hourly intervals and the average and standard

690

deviations from three biological replicates plotted. (B and C) Quantification of amino acid

691

levels in culture supernatants. Spent medium samples from the cultures shown in panel A

692

were prepared at the 0, 6, 10 and 12 h time points and (B) aspartate and (C) serine levels

693

determined as previously described using an amino acid analyzer (Halsey *et al.*, 2017). The

694

average values and standard deviations from 3 biological replicates were plotted. The plots

695

for all other amino acids measured are shown in Figure S1.

696

697



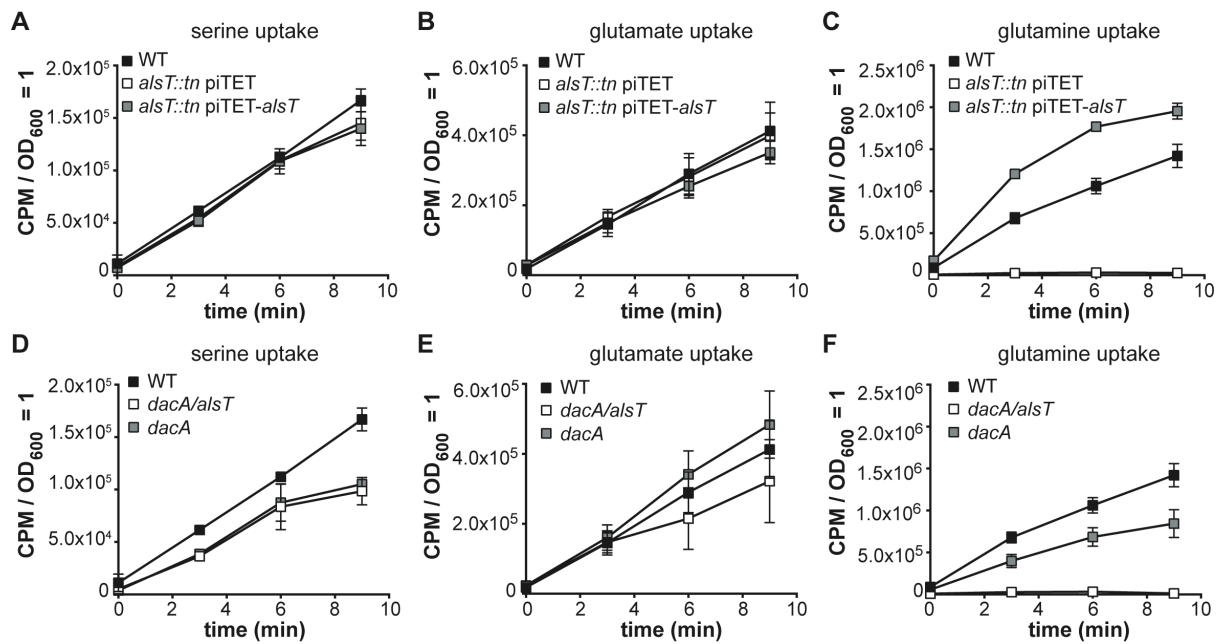

698

699 **FIG 3: AlsT is a main glutamine transporter in *S. aureus*. Amino acid uptake assays. (A-**  
 700 **C) *S. aureus* strain LAC\* (WT), the *alsT* mutant LAC\**alsT::tn piTET* (*alsT::tn piTET*) and the**  
 701 **complementation strain LAC\**alsT::tn piTET-alsT* (*alsT::tn piTET-alsT*) were grown to mid-log**  
 702 **phase in CDM supplemented with 200 ng/ml Atet for the strains containing the piTET**  
 703 **plasmids. Subsequently radiolabelled (A) serine, (B) glutamate or (C) glutamine was added**  
 704 **to culture aliquots, samples removed and filtered at the indicated time points and the**  
 705 **radioactivity accumulated in the cells measured. The average values and standard**  
 706 **deviations from three (A,C,D,F) or four (B,E) experiments were plotted. (D-F) The same**  
 707 **uptake assay experiment was performed as described in (A-C) but using *S. aureus* strains**  
 708 **LAC\**dacA::kan* (*dacA*) and LAC\**dacA/alsT* (*dacA/alsT*). The amino acid uptake curve for the**  
 709 **LAC\* (WT) strain is the same as shown in panels A-C, as all strains were grown and**  
 710 **processed at the same time.**

711

712

713

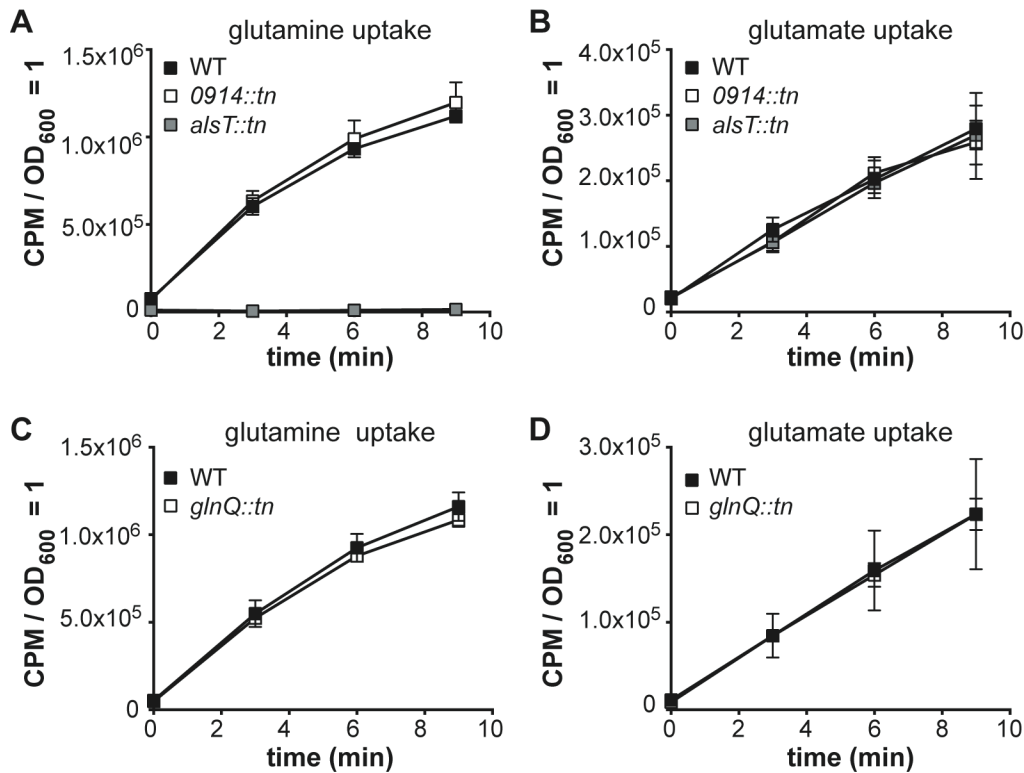

714

715

716 **FIG 4: LAC\*0914::tn and LAC\*glnQ::tn strains do not show a defect in glutamine or**

717 **glutamate uptake.** (A and B) Amino acid uptake assays. *S. aureus* strains LAC\* (WT) and

718 LAC\*0914::tn were grown to mid-log phase in CDM. Subsequently radiolabelled (A)

719 glutamine and (B) glutamate was added to culture aliquots, samples removed and filtered at

720 the indicated time points and the radioactivity accumulated in the cells measured. The

721 average values and standard deviations from three experiments were plotted. (C and D)

722 Amino acid uptake assays. Amino acid uptake assays were performed and the data plotted

723 as described in panels A and B, using *S. aureus* LAC\* (WT) and LAC\*glnQ::tn (*glnQ::tn*).

724

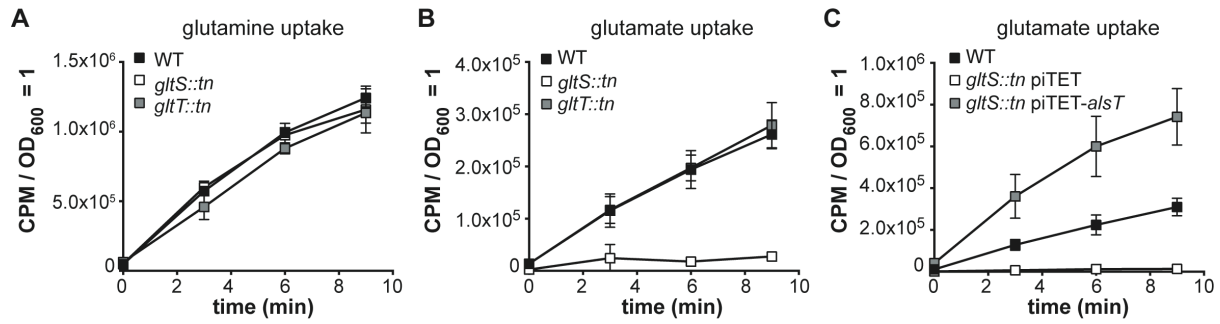

725

726 **FIG 5: GltS is a main glutamate transporter in *S. aureus*.** Amino acid uptake assays. (A

727 and B) *S. aureus* strains LAC\* (WT), LAC\**gltT::tn* and LAC\**gltS::tn* were grown to mid-log

728 phase in CDM. Subsequently radiolabelled (A) glutamine or (B) glutamate was added to

729 culture aliquots, samples removed and filtered at the indicated time points and the

730 radioactivity accumulated in the cells measured. (C) Same as (B) but using *S. aureus* strains

731 LAC\* (WT), LAC\**gltS::tn* piTET and the complementation strain LAC\**gltS::tn* piTET-*gltS* and

732 supplementing the CDM medium with 200 ng/μl Atet. The average values and standard

733 deviations from three experiments were plotted.

734

735

736

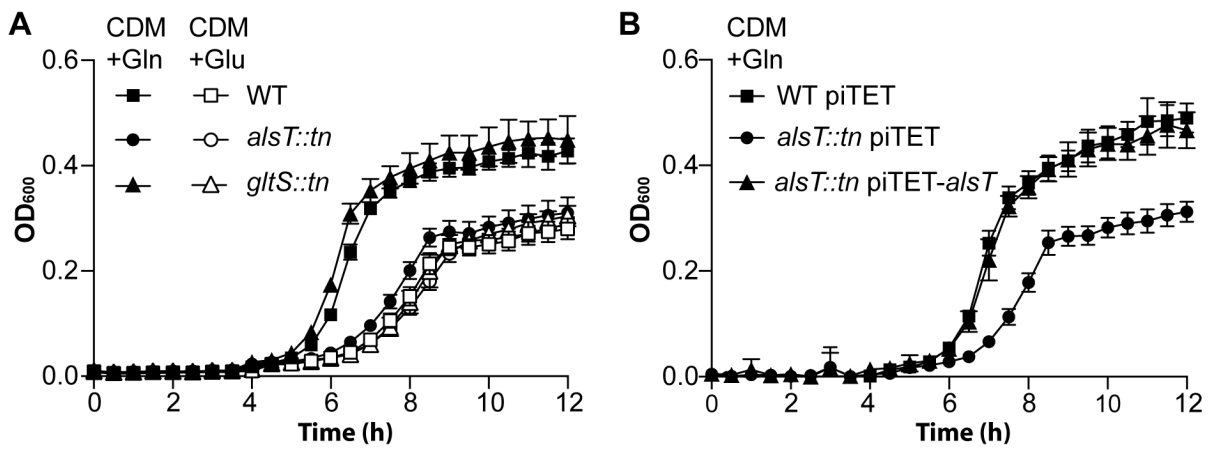

737

738

739

**Figure 6. Addition of glutamine but not glutamate can stimulate the growth of *S.***

740

***aureus* in CDM lacking ammonium as nitrogen source. (A)** Growth curves of *S. aureus*

741

strains LAC\* (WT), LAC\**gltS::tn* (*gltS::tn*) and LAC\**alsT::tn* (*alsT::tn*). The strains were

742

grown in CDM medium lacking ammonium and containing either glutamine (CDM+Gln) or

743

glutamate (CDM+Glu). OD<sub>600</sub> readings were measured every 30 min. Average and standard

744

deviations of six technical replicates were plotted. This experiment is a representative result

745

of three independent experiments. (B) Same as (A) but using the *S. aureus* strains LAC\*

746

(WT), LAC\**alsT::tn* piTET and the complementation strain LAC\**alsT::tn* piTET-*alsT* grown in

747

CDM+Gln medium supplemented with 200 ng/μl Atet.

748

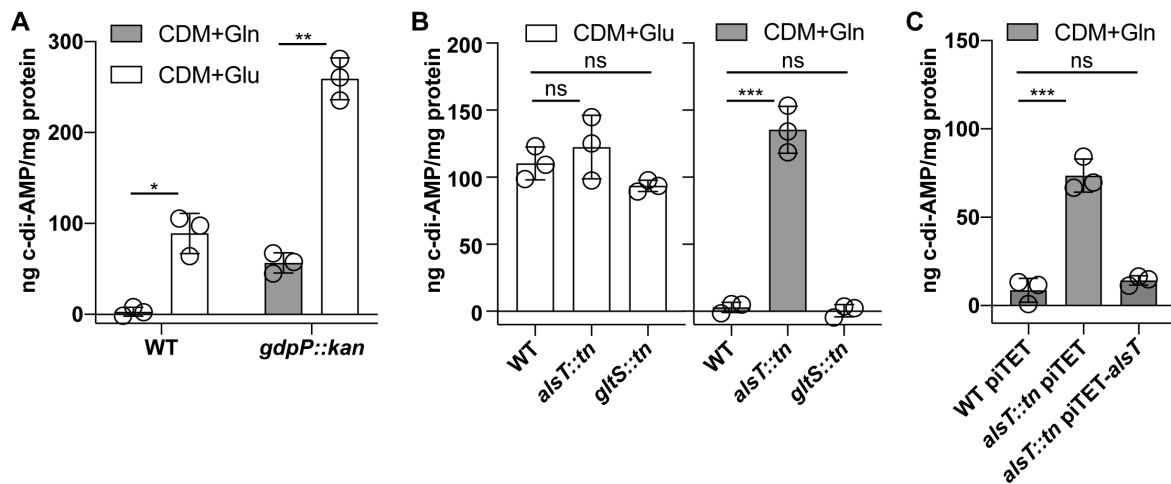

749

750 **Figure 7. Glutamine uptake inhibits c-di-AMP production in *S. aureus*.** (A) *S. aureus*

751 strains LAC\* (WT) and LAC\* *gdpP::kan* (*gdpP::kan*) were grown in CDM+Gln or CDM+Glu.

752 Cell extracts were prepared, and cellular c-di-AMP levels determined using a competitive

753 ELISA assay. The average values and standard deviation from three biological replicates

754 were determined and c-di-AMP levels plotted as ng c-di-AMP/ mg protein. For statistical

755 analysis f-tests and Student's t-tests were performed and c-di-AMP levels were found to be

756 statistically significantly different for both WT and the *gdpP* mutant, when grown in the

757 different media (\* =  $p < 0.01$  and \*\*  $p < 0.001$ ). (B) *S. aureus* strains LAC\* (WT), LAC\**gltS::tn*

758 (*gltS::tn*) and LAC\**alsT::tn* (*alsT::tn*) were grown in CDM+Glu (white columns) or CDM+Gln

759 (grey columns) and c-di-AMP concentrations determined and plotted as described in (A). (C)

760 *S. aureus* strains LAC\* piTET, LAC\**alsT::tn* piTET and the complementation strain

761 LAC\**alsT::tn* piTET-*alsT* were grown in CDM+Gln supplemented with 200 ng/ $\mu$ l Atet and c-

762 di-AMP levels determined as described in (A). For panels B and C, one-way ANOVA

763 followed by Dunnett's multiple comparison tests were performed to identify statistically

764 significant differences in c-di-AMP levels between WT and the mutant strains (ns = not

765 significant, \*\*\* =  $p < 0.0001$ ).

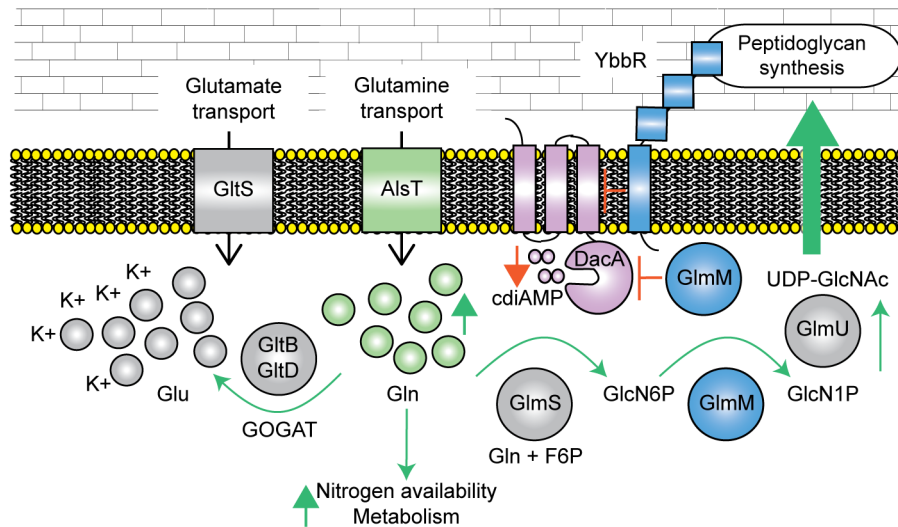

766

767 **Figure 8. Model of how AlsT-mediated glutamine uptake impacts bacterial physiology**

768 **and c-di-AMP production.** As shown as part of this study, the proteins AlsT

769 (SAUSA300\_1252) and GltS (SAUSA300\_2291) are the main glutamine (Gln) and

770 glutamate (Glu) transporters in *S. aureus*, respectively. A high glutamine/glutamate ratio

771 signals nitrogen availability and hence glutamine uptake is thought to stimulate the bacterial

772 metabolism. Glutamine is further converted by the GOGAT enzymes GltB and GltD to

773 glutamate, the cellular counterion of potassium. Glutamine is also an important precursor for

774 the synthesis of the essential peptidoglycan precursor UDP-GlcNAc. Glutamine and

775 fructose-6-P (F6P) are converted by GlmS to glucosamine-6-P (GlcN6P), which is converted

776 by GlmM to glycosamine-1-P (GlcN1P) and then utilized by GlmU for the production of UDP-

777 GlcNAc. GlmM has been shown to directly interact and inhibit the activity of the c-di-AMP

778 cyclase DacA. Based on the data presented in this study, glutamine uptake could potentially

779 stimulate the GlmM/DacA interaction resulting in the observed reduction in c-di-AMP

780 production. Alternatively, a potential increased flow of glutamine into peptidoglycan

781 precursor and actual peptidoglycan synthesis could be sensed by the proposed regulator

782 protein YbbR. Once such a signal is perceived by YbbR, it will be transduced to the c-di-

783 AMP cyclase DacA leading to reduced c-di-AMP production. Reactions predicted to increase

784 upon glutamine update are indicated by green arrows and the reduced c-di-AMP synthesis

785 (potentially mediated by interaction with GlmM or YbbR) is indicated by a red arrow.

786

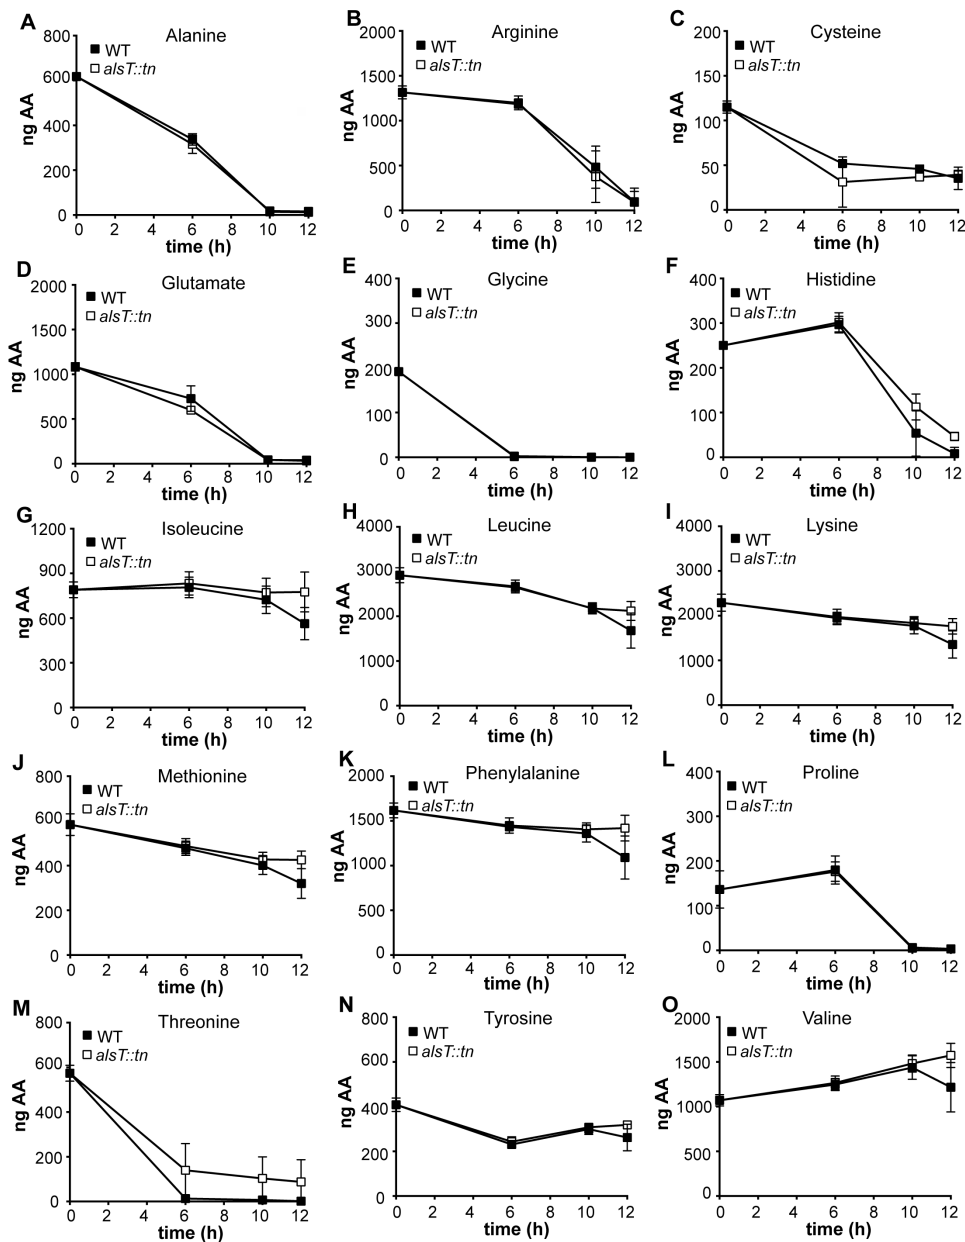

787

788 **FIG S1: Amino acid uptake analysis to determine the function of AlsT. (A-O)**

789 Quantification of amino acid levels in culture supernatants. Spent medium samples from the

790 cultures shown in Fig. 2 panel A were prepared at the 0, 6, 10 and 12 h time points and

791 amino acid levels as indicated above each panel determined as previously described using

792 an amino acid analyzer (Halsey *et al.*, 2017). The average values and standard deviations

793 from 3 independent biological replicates were plotted.





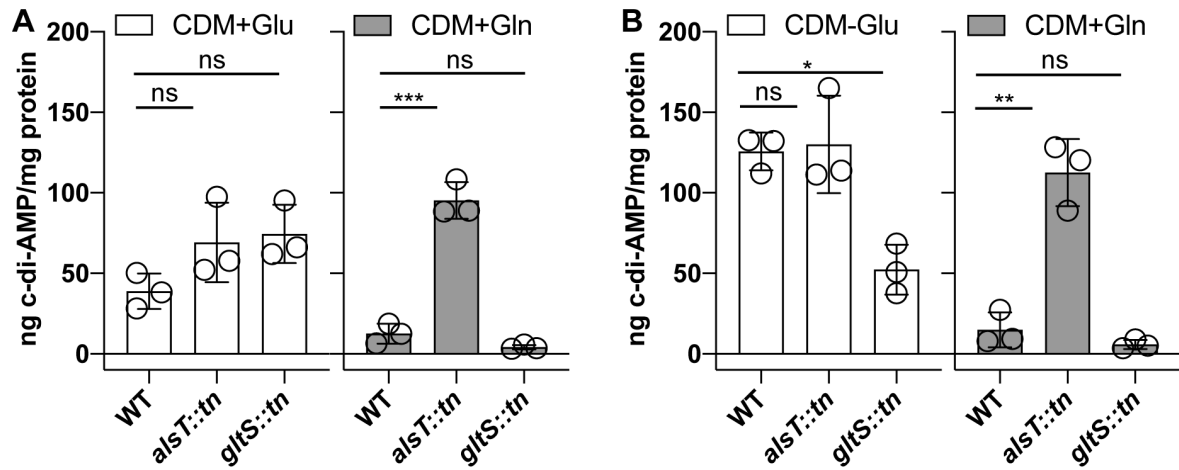

802

803

804 **Figure S3. Glutamine uptake inhibits c-di-AMP production in *S. aureus*, but no clear**

805 **differences are seen upon glutamate uptake. (A and B) *S. aureus* strains LAC\* (WT),**

806 **LAC\**gltS::tn* (*gltS::tn*) and LAC\**alsT::tn* (*alsT::tn*) were grown in CDM+Glu (white columns)**

807 **or CDM+Gln (grey columns) and c-di-AMP concentrations determined and plotted as**

808 **described in Figure 7. The data shown in panels A and B are two additional experimental**

809 **replicates of the data shown in Fig. 7B. One-way ANOVA tests followed by a Dunnett's**

810 **multiple comparison tests were performed to identify statistically significant differences in c-**

811 **di-AMP levels between WT and the mutant strains (ns = not significant; \* = p<0.01; \*\* =**

812 **p<0.001; \*\*\* = p<0.0001).**

813

## 814 References

- 815 Anderson, C.B., and Witter, L.D. (1982) Glutamine and proline accumulation by  
816 *Staphylococcus aureus* with reduction in water activity. *Appl Environ Microbiol* **43**:  
817 1501-1503.
- 818 Bai, Y., Yang, J., Zarrella, T.M., Zhang, Y., Metzger, D.W., and Bai, G. (2014) Cyclic di-AMP  
819 impairs potassium uptake mediated by a cyclic di-AMP binding protein in  
820 *Streptococcus pneumoniae*. *J Bacteriol* **196**: 614-623.
- 821 Boles, B.R., Thoendel, M., Roth, A.J., and Horswill, A.R. (2010) Identification of genes  
822 involved in polysaccharide-independent *Staphylococcus aureus* biofilm formation.  
823 *PLoS One* **5**: e10146.
- 824 Bowman, L., Zeden, M.S., Schuster, C.F., Kaefer, V., and Gründling, A. (2016) New Insights  
825 into the Cyclic Di-adenosine Monophosphate (c-di-AMP) Degradation Pathway and  
826 the Requirement of the Cyclic Dinucleotide for Acid Stress Resistance in  
827 *Staphylococcus aureus*. *J Biol Chem* **291**: 26970-26986.
- 828 Chin, K.H., Liang, J.M., Yang, J.G., Shih, M.S., Tu, Z.L., Wang, Y.C., Sun, X.H., Hu, N.J.,  
829 Liang, Z.X., Dow, J.M., Ryan, R.P., and Chou, S.H. (2015) Structural Insights into the  
830 Distinct Binding Mode of Cyclic Di-AMP with SaCpaA\_RCK. *Biochemistry* **54**: 4936-  
831 4951.
- 832 Corrigan, R.M., Abbott, J.C., Burhenne, H., Kaefer, V., and Gründling, A. (2011) c-di-AMP is  
833 a new second messenger in *Staphylococcus aureus* with a role in controlling cell size  
834 and envelope stress. *PLoS Pathog* **7**: e1002217.
- 835 Corrigan, R.M., Bowman, L., Willis, A.R., Kaefer, V., and Gründling, A. (2015) Cross-talk  
836 between two nucleotide-signaling pathways in *Staphylococcus aureus*. *J Biol Chem*  
837 **290**: 5826-5839.
- 838 Corrigan, R.M., Campeotto, I., Jeganathan, T., Roelofs, K.G., Lee, V.T., and Gründling, A.  
839 (2013) Systematic identification of conserved bacterial c-di-AMP receptor proteins.  
840 *Proc Natl Acad Sci U S A* **110**: 9084-9089.
- 841 Crooke, A.K., Fuller, J.R., Obrist, M.W., Tomkovich, S.E., Vitko, N.P., and Richardson, A.R.  
842 (2013) CcpA-independent glucose regulation of lactate dehydrogenase 1 in  
843 *Staphylococcus aureus*. *PLoS One* **8**: e54293.
- 844 DeFrancesco, A.S., Masloboeva, N., Syed, A.K., DeLoughery, A., Bradshaw, N., Li, G.W.,  
845 Gilmore, M.S., Walker, S., and Losick, R. (2017) Genome-wide screen for genes  
846 involved in eDNA release during biofilm formation by *Staphylococcus aureus*. *Proc*  
847 *Natl Acad Sci U S A* **114**: E5969-E5978.
- 848 Deguchi, Y., Yamato, I., and Anraku, Y. (1990) Nucleotide sequence of *gltS*, the  
849 Na<sup>+</sup>/glutamate symport carrier gene of *Escherichia coli* B. *J Biol Chem* **265**: 21704-  
850 21708.
- 851 Devaux, L., Sleiman, D., Mazzuoli, M.V., Gominet, M., Lanotte, P., Trieu-Cuot, P., Kaminski,  
852 P.A., and Firon, A. (2018) Cyclic di-AMP regulation of osmotic homeostasis is  
853 essential in Group B *Streptococcus*. *PLoS Genet* **14**: e1007342.
- 854 Fahmi, T., Faozia, S., Port, G., and Cho, K.H. (2019) The Second Messenger c-di-AMP  
855 Regulates Diverse Cellular Pathways Involved in Stress Response, Biofilm  
856 Formation, Cell Wall Homeostasis, SpeB Expression and Virulence in *Streptococcus*  
857 *pyogenes*. *Infect Immun*.
- 858 Fey, P.D., Endres, J.L., Yajjala, V.K., Widhelm, T.J., Boissy, R.J., Bose, J.L., and Bayles,  
859 K.W. (2013) A genetic resource for rapid and comprehensive phenotype screening of  
860 nonessential *Staphylococcus aureus* genes. *MBio* **4**: e00537-00512.
- 861 Fisher, S.H. (1999) Regulation of nitrogen metabolism in *Bacillus subtilis*: vive la difference!  
862 *Mol Microbiol* **32**: 223-232.
- 863 Forchhammer, K. (2007) Glutamine signalling in bacteria. *Front Biosci-Landmark* **12**: 358-  
864 370.
- 865 Fridkin, S.K., Hageman, J.C., Morrison, M., Sanza, L.T., Como-Sabetti, K., Jernigan, J.A.,  
866 Harriman, K., Harrison, L.H., Lynfield, R., Farley, M.M., and Active Bacterial Core  
867 Surveillance Program of the Emerging Infections Program, N. (2005) Methicillin-

- 868 resistant *Staphylococcus aureus* disease in three communities. *N Engl J Med* **352**:  
869 1436-1444.
- 870 Fuller, J.R., Vitko, N.P., Perkowski, E.F., Scott, E., Khatri, D., Spontak, J.S., Thurlow, L.R.,  
871 and Richardson, A.R. (2011) Identification of a lactate-quinone oxidoreductase in  
872 *Staphylococcus aureus* that is essential for virulence. *Front Cell Infect Microbiol* **1**:  
873 19.
- 874 Gründling, A., and Schneewind, O. (2007) Genes required for glycolipid synthesis and  
875 lipoteichoic acid anchoring in *Staphylococcus aureus*. *J Bacteriol* **189**: 2521-2530.
- 876 Gundlach, J., Commichau, F.M., and Stülke, J. (2017a) Perspective of ions and  
877 messengers: an intricate link between potassium, glutamate, and cyclic di-AMP. *Curr*  
878 *Genet*.
- 879 Gundlach, J., Dickmanns, A., Schröder-Tittmann, K., Neumann, P., Kaesler, J., Kampf, J.,  
880 Herzberg, C., Hammer, E., Schwede, F., Kaefer, V., Tittmann, K., Stülke, J., and  
881 Ficner, R. (2015a) Identification, characterization, and structure analysis of the cyclic  
882 di-AMP-binding PII-like signal transduction protein DarA. *J Biol Chem* **290**: 3069-  
883 3080.
- 884 Gundlach, J., Herzberg, C., Hertel, D., Thurmer, A., Daniel, R., Link, H., and Stülke, J.  
885 (2017b) Adaptation of *Bacillus subtilis* to Life at Extreme Potassium Limitation. *MBio*  
886 **8**.
- 887 Gundlach, J., Herzberg, C., Kaefer, V., Gunka, K., Hoffmann, T., Weiss, M., Gibhardt, J.,  
888 Thurmer, A., Hertel, D., Daniel, R., Bremer, E., Commichau, F.M., and Stülke, J.  
889 (2017c) Control of potassium homeostasis is an essential function of the second  
890 messenger cyclic di-AMP in *Bacillus subtilis*. *Sci Signal* **10**.
- 891 Gundlach, J., Krüger, L., Herzberg, C., Turdiev, A., Poehlein, A., Tascon, I., Weiß, M.,  
892 Hertel, D., Daniel, R., Hänelt, I., Lee, V.T., and Stülke, J. (2019) Sustained sensing in  
893 potassium homeostasis: Cyclic di-AMP controls potassium uptake by KimA at the  
894 levels of expression and activity. *J Biol Chem* **294**: 9605-9614.
- 895 Gundlach, J., Mehne, F.M., Herzberg, C., Kampf, J., Valerius, O., Kaefer, V., and Stülke, J.  
896 (2015b) An Essential Poison: Synthesis and Degradation of Cyclic Di-AMP in  
897 *Bacillus subtilis*. *J Bacteriol* **197**: 3265-3274.
- 898 Gunka, K., and Commichau, F.M. (2012) Control of glutamate homeostasis in *Bacillus*  
899 *subtilis*: a complex interplay between ammonium assimilation, glutamate  
900 biosynthesis and degradation. *Mol Microbiol* **85**: 213-224.
- 901 Halsey, C.R., Lei, S., Wax, J.K., Lehman, M.K., Nuxoll, A.S., Steinke, L., Sadykov, M.,  
902 Powers, R., and Fey, P.D. (2017) Amino Acid Catabolism in *Staphylococcus aureus*  
903 and the Function of Carbon Catabolite Repression. *MBio* **8**.
- 904 Hengge, R. (2009) Principles of c-di-GMP signalling in bacteria. *Nat Rev Microbiol* **7**: 263-  
905 273.
- 906 Huynh, T.N., Choi, P.H., Sureka, K., Ledvina, H.E., Campillo, J., Tong, L., and Woodward,  
907 J.J. (2016) Cyclic di-AMP targets the cystathionine beta-synthase domain of the  
908 osmolyte transporter OpuC. *Mol Microbiol*.
- 909 Kelly, B., and O'Neill, L.A. (2015) Metabolic reprogramming in macrophages and dendritic  
910 cells in innate immunity. *Cell Res* **25**: 771-784.
- 911 Kim, H., Youn, S.J., Kim, S.O., Ko, J., Lee, J.O., and Choi, B.S. (2015) Structural Studies of  
912 Potassium Transport Protein KtrA Regulator of Conductance of K<sup>+</sup> (RCK) C Domain  
913 in Complex with Cyclic Diadenosine Monophosphate (c-di-AMP). *J Biol Chem* **290**:  
914 16393-16402.
- 915 Kluytmans, J., van Belkum, A., and Verbrugh, H. (1997) Nasal carriage of *Staphylococcus*  
916 *aureus*: epidemiology, underlying mechanisms, and associated risks. *Clin Microbiol*  
917 *Rev* **10**: 505-520.
- 918 Lehman, M.K., Nuxoll, A.S., Yamada, K.J., Kielian, T., Carson, S.D., and Fey, P.D. (2019)  
919 Protease-Mediated Growth of *Staphylococcus aureus* on Host Proteins Is *opp3*  
920 Dependent. *MBio* **10**.



- 921 Mehne, F.M., Gunka, K., Eilers, H., Herzberg, C., Kaefer, V., and Stülke, J. (2013) Cyclic di-  
922 AMP homeostasis in *Bacillus subtilis*: both lack and high level accumulation of the  
923 nucleotide are detrimental for cell growth. *J Biol Chem* **288**: 2004-2017.
- 924 Mirouze, N., Bidnenko, E., Noirot, P., and Auger, S. (2015) Genome-wide mapping of TnrA-  
925 binding sites provides new insights into the TnrA regulon in *Bacillus subtilis*.  
926 *Microbiologyopen* **4**: 423-435.
- 927 Monk, I.R., Shah, I.M., Xu, M., Tan, M.W., and Foster, T.J. (2012) Transforming the  
928 untransformable: application of direct transformation to manipulate genetically  
929 *Staphylococcus aureus* and *Staphylococcus epidermidis*. *MBio* **3**.
- 930 Monk, I.R., Tree, J.J., Howden, B.P., Stinear, T.P., and Foster, T.J. (2015) Complete Bypass  
931 of Restriction Systems for Major *Staphylococcus aureus* Lineages. *MBio* **6**: e00308-  
932 00315.
- 933 Moscoso, J.A., Schramke, H., Zhang, Y., Tosi, T., Dehbi, A., Jung, K., and Gründling, A.  
934 (2015) Binding of Cyclic Di-AMP to the *Staphylococcus aureus* Sensor Kinase KdpD  
935 Occurs via the Universal Stress Protein Domain and Downregulates the Expression  
936 of the Kdp Potassium Transporter. *J Bacteriol* **198**: 98-110.
- 937 Pham, H.T., Nhiep, N.T.H., Vu, T.N.M., Huynh, T.N., Zhu, Y., Huynh, A.L.D., Chakraborti,  
938 A., Marcellin, E., Lo, R., Howard, C.B., Bansal, N., Woodward, J.J., Liang, Z.X., and  
939 Turner, M.S. (2018) Enhanced uptake of potassium or glycine betaine or export of  
940 cyclic-di-AMP restores osmoresistance in a high cyclic-di-AMP *Lactococcus lactis*  
941 mutant. *PLoS Genet* **14**: e1007574.
- 942 Pham, H.T., and Turner, M.S. (2019) Onwards and [K(+)]upwards: a new potassium  
943 importer under the spell of cyclic-di-AMP. *J Bacteriol*.
- 944 Pham, T.H., Liang, Z.X., Marcellin, E., and Turner, M.S. (2016) Replenishing the cyclic-di-  
945 AMP pool: regulation of diadenylate cyclase activity in bacteria. *Curr Genet* **62**: 731-  
946 738.
- 947 Quintana, I.M., Gibhardt, J., Turdiev, A., Hammer, E., Commichau, F.M., Lee, V.T., Magni,  
948 C., and Stülke, J. (2019) The KupA and KupB proteins of *Lactococcus lactis* IL1403  
949 are novel c-di-AMP receptor proteins responsible for potassium uptake. *J Bacteriol*.
- 950 Randazzo, P., Aucouturier, A., Delumeau, O., and Auger, S. (2017) Revisiting the in vivo  
951 GlnR-binding sites at the genome scale in *Bacillus subtilis*. *BMC Res Notes* **10**: 422.
- 952 Richardson, A.R., Libby, S.J., and Fang, F.C. (2008) A nitric oxide-inducible lactate  
953 dehydrogenase enables *Staphylococcus aureus* to resist innate immunity. *Science*  
954 **319**: 1672-1676.
- 955 Rismondo, J., Gibhardt, J., Rosenberg, J., Kaefer, V., Halbedel, S., and Commichau, F.M.  
956 (2016) Phenotypes Associated with the Essential Diadenylate Cyclase CdaA and Its  
957 Potential Regulator CdaR in the Human Pathogen *Listeria monocytogenes*. *J*  
958 *Bacteriol* **198**: 416-426.
- 959 Rocha, R., Teixeira-Duarte, C.M., Jorge, J.M.P., and Morais-Cabral, J.H. (2019)  
960 Characterization of the molecular properties of KtrC, a second RCK domain that  
961 regulates a Ktr channel in *Bacillus subtilis*. *J Struct Biol* **205**: 34-43.
- 962 Römling, U. (2008) Great times for small molecules: c-di-AMP, a second messenger  
963 candidate in Bacteria and Archaea. *Sci Signal* **1**: pe39.
- 964 Satomura, T., Shimura, D., Asai, K., Sadaie, Y., Hirooka, K., and Fujita, Y. (2005)  
965 Enhancement of glutamine utilization in *Bacillus subtilis* through the GlnK-GlnL two-  
966 component regulatory system. *J Bacteriol* **187**: 4813-4821.
- 967 Schuster, C.F., Bellows, L.E., Tosi, T., Campeotto, I., Corrigan, R.M., Freemont, P., and  
968 Gründling, A. (2016) The second messenger c-di-AMP inhibits the osmolyte uptake  
969 system OpuC in *Staphylococcus aureus*. *Sci Signal* **9**: ra81.
- 970 Schuurman-Wolters, G.K., and Poolman, B. (2005) Substrate specificity and ionic regulation  
971 of GlnPQ from *Lactococcus lactis*. An ATP-binding cassette transporter with four  
972 extracytoplasmic substrate-binding domains. *J Biol Chem* **280**: 23785-23790.
- 973 Spahich, N.A., Vitko, N.P., Thurlow, L.R., Temple, B., and Richardson, A.R. (2016)  
974 *Staphylococcus aureus* lactate- and malate-quinone oxidoreductases contribute to  
975 nitric oxide resistance and virulence. *Mol Microbiol* **100**: 759-773.

- 976 Sureka, K., Choi, P.H., Precit, M., Delince, M., Pensinger, D., Huynh, T.N., Jurado, A.R.,  
977 Goo, Y.A., Sadilek, M., Iavarone, A.T., Sauer, J.D., Tong, L., and Woodward, J.J.  
978 (2014) The cyclic dinucleotide c-di-AMP is an allosteric regulator of metabolic  
979 enzyme function. *Cell* **158**: 1389-1401.
- 980 Teh, W.K., Dramsi, S., Tolker-Nielsen, T., Yang, L., and Givskov, M. (2019) Increased  
981 Intracellular Cyclic di-AMP Levels Sensitize *Streptococcus gallolyticus* subsp.  
982 gallolyticus to Osmotic Stress and Reduce Biofilm Formation and Adherence on  
983 Intestinal Cells. *J Bacteriol* **201**.
- 984 Tolner, B., Ubbink-Kok, T., Poolman, B., and Konings, W.N. (1995) Characterization of the  
985 proton/glutamate symport protein of *Bacillus subtilis* and its functional expression in  
986 *Escherichia coli*. *J Bacteriol* **177**: 2863-2869.
- 987 Tosi, T., Hoshiga, F., Millership, C., Singh, R., Eldrid, C., Patin, D., Mengin-Lecreulx, D.,  
988 Thalassinou, K., Freemont, P., and Gründling, A. (2019) Inhibition of the  
989 *Staphylococcus aureus* c-di-AMP cyclase DacA by direct interaction with the  
990 phosphoglucosamine mutase GlmM. *PLoS Pathog* **15**: e1007537.
- 991 Underwood, A.J., Zhang, Y., Metzger, D.W., and Bai, G. (2014) Detection of cyclic di-AMP  
992 using a competitive ELISA with a unique pneumococcal cyclic di-AMP binding  
993 protein. *J Microbiol Methods* **107**: 58-62.
- 994 Vitko, N.P., Spahich, N.A., and Richardson, A.R. (2015) Glycolytic dependency of high-level  
995 nitric oxide resistance and virulence in *Staphylococcus aureus*. *MBio* **6**.
- 996 Whiteley, A.T., Garelis, N.E., Peterson, B.N., Choi, P.H., Tong, L., Woodward, J.J., and  
997 Portnoy, D.A. (2017) c-di-AMP modulates *Listeria monocytogenes* central  
998 metabolism to regulate growth, antibiotic resistance and osmoregulation. *Mol*  
999 *Microbiol* **104**: 212-233.
- 1000 Whiteley, A.T., Pollock, A.J., and Portnoy, D.A. (2015) The PAMP c-di-AMP Is Essential for  
1001 *Listeria monocytogenes* Growth in Rich but Not Minimal Media due to a Toxic  
1002 Increase in (p)ppGpp. *Cell Host Microbe* **17**: 788-798.
- 1003 Wicke, D., Schulz, L.M., Lentjes, S., Scholz, P., Poehlein, A., Gibhardt, J., Daniel, R.,  
1004 Ischebeck, T., and Commichau, F.M. (2019) Identification of the first glyphosate  
1005 transporter by genomic adaptation. *Environ Microbiol* **21**: 1287-1305.
- 1006 Witte, C.E., Whiteley, A.T., Burke, T.P., Sauer, J.D., Portnoy, D.A., and Woodward, J.J.  
1007 (2013) Cyclic di-AMP is critical for *Listeria monocytogenes* growth, cell wall  
1008 homeostasis, and establishment of infection. *MBio* **4**: e00282-00213.
- 1009 Woodward, J.J., Iavarone, A.T., and Portnoy, D.A. (2010) c-di-AMP secreted by intracellular  
1010 *Listeria monocytogenes* activates a host type I interferon response. *Science* **328**:  
1011 1703-1705.
- 1012 Yoshida, K., Yamaguchi, H., Kinehara, M., Ohki, Y.H., Nakaura, Y., and Fujita, Y. (2003)  
1013 Identification of additional TnrA-regulated genes of *Bacillus subtilis* associated with a  
1014 TnrA box. *Mol Microbiol* **49**: 157-165.
- 1015 Zarrella, T.M., Metzger, D.W., and Bai, G. (2018) Stress Suppressor Screening Leads to  
1016 Detection of Regulation of Cyclic di-AMP Homeostasis by a Trk Family Effector  
1017 Protein in *Streptococcus pneumoniae*. *J Bacteriol* **200**.
- 1018 Zeden, M.S., Schuster, C.F., Bowman, L., Zhong, Q., Williams, H.D., and Gründling, A.  
1019 (2018) Cyclic di-adenosine monophosphate (c-di-AMP) is required for osmotic  
1020 regulation in *Staphylococcus aureus* but dispensable for viability in anaerobic  
1021 conditions. *J Biol Chem* **293**: 3180-3200.
- 1022 Zhu, Y., Pham, T.H., Nhiep, T.H., Vu, N.M., Marcellin, E., Chakraborti, A., Wang, Y.,  
1023 Waanders, J., Lo, R., Huston, W.M., Bansal, N., Nielsen, L.K., Liang, Z.X., and  
1024 Turner, M.S. (2016) Cyclic-di-AMP synthesis by the diadenylate cyclase CdaA is  
1025 modulated by the peptidoglycan biosynthesis enzyme GlmM in *Lactococcus lactis*.  
1026 *Mol Microbiol* **99**: 1015-1027.
- 1027 Zhu, Y., Xiong, Y.Q., Sadykov, M.R., Fey, P.D., Lei, M.G., Lee, C.Y., Bayer, A.S., and  
1028 Somerville, G.A. (2009) Tricarboxylic acid cycle-dependent attenuation of  
1029 *Staphylococcus aureus* in vivo virulence by selective inhibition of amino acid  
1030 transport. *Infect Immun* **77**: 4256-4264.
